# Supplementary material for: The role of college and university faculty in the fossil fuel divestment movement
Source: Oxford University Press journal article supplement (doi:10.1525/elementa.297), 2018-01-01
Supplement: elementa-6-297-s1.xlsx [file elementa-6-297-s1.xlsx]

## Sheet: Combined
Table S1. A complete database of all faculty signatories who have signed open letters in support of fossil fuel divestment.
Name	Type of Faculty Position	Academic Discipline	Institution	National Academy Membership
Aaron Garrett	Associate Professor	Arts and Humanities	Boston University
Adam Lerner	Professor	Medicine/Public Health	Boston University
Adam Sweeting	Associate Professor	Arts and Humanities	Boston University
Adrian Whitty	Associate Professor	Natural Science	Boston University
Adrien Finzi	Professor	Natural Science	Boston University
Ahmad Khalil	Assistant Professor	Engineering	Boston University
Alan B. Cohen	Professor	Business	Boston University
Alan Strahler	Professor	Natural Science/Earth and Atmospheric Science	Boston University
Ali Guermazi	Associate Professor	Medicine/Public Health	Boston University
Alisa Bokulich	Associate Professor	Arts and Humanities	Boston University
Alya Guseva	Associate Professor	Social Sciences	Boston University
Amresh Hanchate	Assistant Professor	Medicine/Public Health	Boston University
Andre de Quadros	Professor	Arts and Humanities	Boston University
Andrei Lapets	Instructor or Lecturer	Natural Science	Boston University
Anita Patterson	Professor	Arts and Humanities	Boston University
Arianne Chernock	Associate Professor	Social Sciences	Boston University
Assaf Kfoury	Professor	Natural Science	Boston University
Barbara Nikolajczyk	Assistant Professor	Medicine/Public Health	Boston University
Barbara Slack	Associate Professor	Medicine/Public Health	Boston University
Bayla Keyes	Associate Professor	Arts and Humanities	Boston University
Bela Suki	Professor	Engineering	Boston University
Bruce Fraser	Professor	Education	Boston University
Candice Belanoff	Assistant Professor	Medicine/Public Health	Boston University
Carol Neidle	Professor	Arts and Humanities	Boston University
Carrie Preston	Associate Professor	Arts and Humanities	Boston University
Catherine Caldwell-Harris	Associate Professor	Natural Science	Boston University
Charles Henebry	Instructor or Lecturer	Arts and Humanities	Boston University
Charles Rzepka	Professor	Arts and Humanities	Boston University
Charles White	Associate Professor	Education	Boston University
Chris Daly	Associate Professor	Arts and Humanities	Boston University
Chris Roosevelt	Associate Professor	Social Sciences	Boston University
Chris Walsh	Assistant Professor	Arts and Humanities	Boston University
Christina Dobbs	Assistant Professor	Education	Boston University
Christopher Fahy	Instructor or Lecturer	Arts and Humanities	Boston University
Christopher Martell	Assistant Professor	Education	Boston University
Christopher Maurer	Professor	Arts and Humanities	Boston University
Christopher Schneider	Associate Professor	Natural Science	Boston University
Clay Hopper	Instructor or Lecturer	Arts and Humanities	Boston University
Cutler Cleveland	Professor	Natural Science/Earth and Atmospheric Science	Boston University
Cynthia Bradham	Assistant Professor	Natural Science	Boston University
Daniel Hudon	Professor	Natural Science	Boston University
Daniel Ranalli	Professor	Arts and Humanities	Boston University
David Atkinson	Professor	Medicine/Public Health	Boston University
David Lyons	Professor	Law	Boston University
David Mayers	Professor	Social Sciences	Boston University
David Ozonoff	Professor	Medicine/Public Health	Boston University
David Rohrlich	Professor	Natural Science	Boston University
David Shawn	Instructor or Lecturer	Arts and Humanities	Boston University
David Sherr	Professor	Medicine/Public Health	Boston University
David Swartz	Assistant Professor	Social Sciences	Boston University
Davidson Hamer	Professor	Medicine/Public Health	Boston University
Deborah Belle	Professor	Natural Science	Boston University
Deborah Breen	Instructor or Lecturer	Arts and Humanities	Boston University
Deborah Kahn	Associate Professor	Arts and Humanities	Boston University
Deborah Kelemen	Professor	Natural Science	Boston University
Deeana Klepper	Associate Professor	Arts and Humanities	Boston University
Dennis Costa	Associate Professor	Arts and Humanities	Boston University
Diana Lobel	Associate Professor	Arts and Humanities	Boston University
Diane Greco-Josefowicz	Instructor or Lecturer	Arts and Humanities	Boston University
Dino Christenson	Assistant Professor	Social Sciences	Boston University
Don DeRosa	Associate Professor	Education	Boston University
Donald Small	Professor	Medicine/Public Health	Boston University
Douglas Zook	Associate Professor	Education	Boston University
Ducksoo Kim	Professor	Medicine/Public Health	Boston University
Ed Loechler	Professor	Natural Science	Boston University
Elizabeth Hatch	Professor	Medicine/Public Health	Boston University
Ellen DeVoe	Associate Professor	Social Sciences	Boston University
Ellen Silver Highfield	Professor	Medicine/Public Health	Boston University
Emily Barman	Associate Professor	Social Sciences	Boston University
Erin Reid	Assistant Professor	Business	Boston University
Esther Bullitt	Associate Professor	Medicine/Public Health	Boston University
Eugene Green	Professor Emeritus	Arts and Humanities	Boston University
Farzad Mortazavi	Instructor or Lecturer	Medicine/Public Health	Boston University
Francisco Naya	Associate Professor	Natural Science	Boston University
Fred Wasserman	Associate Professor	Natural Science	Boston University
Frederic Fitts	Instructor or Lecturer	Arts and Humanities	Boston University
Garland Waller	Assistant Professor	Arts and Humanities	Boston University
Gary Benson	Associate Professor	Natural Science	Boston University
Gerald Leonard	Professor	Law	Boston University
Gloria Callard	Professor	Natural Science	Boston University
Gustavo Mostoslavsky	Associate Professor	Medicine/Public Health	Boston University
Ha Jin	Professor	Arts and Humanities	Boston University
Helen Barbas	Professor	Medicine/Public Health	Boston University
Helen Tager-Flusberg	Professor	Natural Science	Boston University
Hillel Levine	Professor	Arts and Humanities	Boston University
Horatio Frydman	Assistant Professor	Natural Science	Boston University
Hugh O’Donnell	Professor	Arts and Humanities	Boston University
Ian Davison	Assistant Professor	Natural Science	Boston University
Irene Gendzier	Professor Emeritus	Social Sciences	Boston University
Itai Vardi	Instructor or Lecturer	Social Sciences	Boston University
Ivana Delalle	Associate Professor	Medicine/Public Health	Boston University
J. Keith Vincent	Instructor or Lecturer	Arts and Humanities	Boston University
Jacob Bor	Assistant Professor	Medicine/Public Health	Boston University
Jacob Groshek	Assistant Professor	Arts and Humanities	Boston University
Jacqueline Liederman	Professor	Natural Science	Boston University
James Baldwin	Instructor or Lecturer	Natural Science/Earth and Atmospheric Science	Boston University
James Cherry	Professor	Natural Science	Boston University
James Hudspeth	Instructor or Lecturer	Medicine/Public Health	Boston University
James McCann	Professor	Social Sciences	Boston University
James Schmidt	Professor	Social Sciences	Boston University
James Siemon	Professor	Arts and Humanities	Boston University
James Traniello	Professor	Natural Science	Boston University
Jane Lannak	Associate Professor	Education	Boston University
Jason Yust	Assistant Professor	Arts and Humanities	Boston University
Jeffrey Browning	Research Scientist, Reseach Professor or Scholar	Medicine/Public Health	Boston University
Jeffrey Rubin	Associate Professor	Social Sciences	Boston University
Jennifer Gottlieb	Research Scientist, Reseach Professor or Scholar	Faculty -uncategorized	Boston University
Jennifer Green	Assistant Professor	Education	Boston University
Jennifer Luebke	Associate Professor	Medicine/Public Health	Boston University
Jennifer Snyder-Cappione	Research Scientist, Reseach Professor or Scholar	Medicine/Public Health	Boston University
Jenny White	Professor	Social Sciences	Boston University
Jen-Wei Lin	Professor	Natural Science	Boston University
Jim Iffland	Professor	Arts and Humanities	Boston University
Joelle Renstrom	Instructor or Lecturer	Arts and Humanities	Boston University
Johannes Schmieder	Assistant Professor	Social Sciences	Boston University
John Bernstein	Associate Professor	Arts and Humanities	Boston University
John Caradonna	Associate Professor	Natural Science	Boston University
John Celenza	Associate Professor	Natural Science	Boston University
John Cho Lee	Associate Professor	Medicine/Public Health	Boston University
John Finnerty	Associate Professor	Natural Science	Boston University
John Hart	Professor	Arts and Humanities	Boston University
John McCarthy	Assistant Professor	Education	Boston University
John McGrath	Associate Professor	Social Sciences	Boston University
John Paul Riquelme	Professor	Arts and Humanities	Boston University
John Snyder	Professor	Natural Science	Boston University
John Stone	Professor	Social Sciences	Boston University
Jon Roberts	Professor	Social Sciences	Boston University
Jonathan Zatlin	Associate Professor	Social Sciences	Boston University
Joseph Zaia	Professor	Medicine/Public Health	Boston University
Joshua Rifkin	Professor	Arts and Humanities	Boston University
Julia Brown	Professor	Arts and Humanities	Boston University
Julian Go	Professor	Social Sciences	Boston University
Juliet Floyd	Professor	Arts and Humanities	Boston University
Jura Avizienis	Instructor or Lecturer	Arts and Humanities	Boston University
Karen Warkentin	Associate Professor	Natural Science	Boston University
Karin Schon	Assistant Professor	Medicine/Public Health	Boston University
Karina Baum	Instructor or Lecturer	Natural Science	Boston University
Karsten Lunze	Research Scientist, Reseach Professor or Scholar	Medicine/Public Health	Boston University
Kathleen Malley-Morrison	Professor	Natural Science	Boston University
Kathryn Spilios	Instructor or Lecturer	Natural Science	Boston University
Keith Morgan	Professor	Arts and Humanities	Boston University
Kirk Dearden	Associate Professor	Medicine/Public Health	Boston University
Kristin Baker	Research Scientist, Reseach Professor or Scholar	Medicine/Public Health	Boston University
Kyna Hamill	Instructor or Lecturer	Faculty -uncategorized	Boston University
Lauren Wise	Associate Professor	Medicine/Public Health	Boston University
Laurie LaPorte	Instructor or Lecturer	Social Sciences	Boston University
Lee Staples	Professor	Social Sciences	Boston University
Les Kaufman	Professor	Natural Science	Boston University
Leslie Epstein	Professor	Arts and Humanities	Boston University
Linda Doerrer	Associate Professor	Natural Science	Boston University
Linda Jiorle-Nagy	Assistant Professor	Arts and Humanities	Boston University
Lucia Lin	Associate Professor	Arts and Humanities	Boston University
Marcia Edson	Assistant Professor	Education	Boston University
Margaret Beck	Assistant Professor	Natural Science	Boston University
Margrit Betke	Professor	Natural Science	Boston University
Marilyn Halter	Professor	Social Sciences	Boston University
Marisa Milanese	Instructor or Lecturer	Arts and Humanities	Boston University
Mark Friedl	Professor	Natural Science/Earth and Atmospheric Science	Boston University
Mark Glickman	Research Scientist, Reseach Professor or Scholar	Medicine/Public Health	Boston University
Mark Stanley	Associate Professor	Arts and Humanities	Boston University
Martin Pearlman	Professor	Arts and Humanities	Boston University
Martin Schmaltz	Professor	Natural Science	Boston University
Mary Jane Doherty	Associate Professor	Arts and Humanities	Boston University
Maryann Amodeo	Professor	Social Sciences	Boston University
Maureen Sullivan	Instructor or Lecturer	Social Sciences	Boston University
Maurice Lee	Professor	Arts and Humanities	Boston University
Meg Tyler	Associate Professor	Arts and Humanities	Boston University
Melissa Kibbe	Assistant Professor	Natural Science	Boston University
Michael Baum	Professor	Natural Science	Boston University
Michael McClean	Associate Professor	Medicine/Public Health	Boston University
Michael Zank	Professor	Arts and Humanities	Boston University
Mitchell Zuckoff	Professor	Arts and Humanities	Boston University
Nancy Crooker	Research Scientist, Reseach Professor or Scholar	Natural Science	Boston University
Nathan Phillips	Professor	Natural Science/Earth and Atmospheric Science	Boston University
Neal Leavitt	Instructor or Lecturer	Arts and Humanities	Boston University
Neta C. Crawford	Professor	Social Sciences	Boston University
Nicole Aschoff	Instructor or Lecturer	Social Sciences	Boston University
Nina Silber	Professor	Social Sciences	Boston University
Olga Gursky	Professor	Medicine/Public Health	Boston University
Olga Hawn	Assistant Professor	Business	Boston University
Pankaj Mehta	Assistant Professor	Natural Science	Boston University
Patricia Rieker	Professor	Social Sciences	Boston University
Paul Barbone	Professor	Engineering	Boston University
Paul Goldberg	Professor	Social Sciences	Boston University
Paul Lipton	Associate Professor	Natural Science	Boston University
Peter Garik	Associate Professor	Education	Boston University
Peter Yeager	Associate Professor	Social Sciences	Boston University
Phyllis Hoffman	Professor	Arts and Humanities	Boston University
Rachael Garrett	Adjunct Faculty	Natural Science/Earth and Atmospheric Science	Boston University
Randall Ellis	Professor	Social Sciences	Boston University
Ranga Myneni	Professor	Natural Science/Earth and Atmospheric Science	Boston University
Rebecca Silliman	Professor	Medicine/Public Health	Boston University
Richard Bunbury	Instructor or Lecturer	Arts and Humanities	Boston University
Richard Cohen	Professor	Medicine/Public Health	Boston University
Richard Samuel Deese	Instructor or Lecturer	Social Sciences	Boston University
Richard Sherva	Professor	Medicine/Public Health	Boston University
Richard West	Associate Professor	Natural Science	Boston University
Rick Reibstein	Instructor or Lecturer	Natural Science/Earth and Atmospheric Science	Boston University
Robert Friedman	Professor	Medicine/Public Health	Boston University
Robert Hoffmeister	Associate Professor	Education	Boston University
Robert Joseph	Assistant Professor	Medicine/Public Health	Boston University
Robert Kotiuga	Associate Professor	Engineering	Boston University
Robert Sloane	Professor	Law	Boston University
Robert Volk	Professor	Law	Boston University
Roberta Micallef	Associate Professor	Arts and Humanities	Boston University
Roy Grundmann	Associate Professor	Arts and Humanities	Boston University
Ruth Paris	Associate Professor	Social Sciences	Boston University
Sam Kauffman	Professor	Arts and Humanities	Boston University
Samina Karim	Associate Professor	Business	Boston University
Samuel Frank	Professor	Medicine/Public Health	Boston University
Sarah Madsen Hardy	Instructor or Lecturer	Arts and Humanities	Boston University
Sarah Phillips	Associate Professor	Social Sciences	Boston University
Sean Elliott	Associate Professor	Natural Science	Boston University
Shahla Haeri	Associate Professor	Social Sciences	Boston University
Sharon Daniels	Associate Professor	Arts and Humanities	Boston University
Shelley Russek	Professor	Medicine/Public Health	Boston University
Shi Yang	Assistant Professor	Medicine/Public Health	Boston University
Siddharth Ramachandran	Professor	Engineering	Boston University
Sigrun Olafsdottir	Associate Professor	Social Sciences	Boston University
Siobhan O’Mahony	Associate Professor	Business	Boston University
Stacey Dogan	Professor	Law	Boston University
Stefano Monti	Professor	Medicine/Public Health	Boston University
Stephanie Byttebier	Instructor or Lecturer	Arts and Humanities	Boston University
Stephanie Watts	Associate Professor	Business	Boston University
Stephen Hodin	Instructor or Lecturer	Arts and Humanities	Boston University
Stephen Kalberg	Associate Professor	Social Sciences	Boston University
Suchi Gopal	Professor	Natural Science/Earth and Atmospheric Science	Boston University
Sudha Seshadri	Professor	Medicine/Public Health	Boston University
Sunil Sharma	Associate Professor	Arts and Humanities	Boston University
Susan Akram	Professor	Law	Boston University
Susan Eckstein	Professor	Social Sciences	Boston University
Susan Kandarian	Professor	Medicine/Public Health	Boston University
Susan Lee	Instructor or Lecturer	Social Sciences	Boston University
Susan Leeman	Professor	Medicine/Public Health	Boston University
Susan Mizruchi	Professor	Arts and Humanities	Boston University
Susan Phillips	Assistant Professor	Medicine/Public Health	Boston University
Susanne Sreedhar	Associate Professor	Arts and Humanities	Boston University
Takashi Kimura	Professor	Natural Science	Boston University
Theodore Moustakas	Professor	Engineering	Boston University
Thomas Barber	Professor	Medicine/Public Health	Boston University
Thomas Perls	Professor	Medicine/Public Health	Boston University
Trevor Siggers	Assistant Professor	Natural Science	Boston University
Valentina Perissi	Assistant Professor	Medicine/Public Health	Boston University
Wiebke Denecke	Associate Professor	Arts and Humanities	Boston University
William Eldred	Professor	Natural Science	Boston University
Accra Shepp	Other	Arts and Humanities	Bowdoin College
Alana Tiemessen	Assistant Professor	Social Sciences	Bowdoin College
Alanna Hoyer-Leitzel	Other	Engineering	Bowdoin College
Allen Springer	Professor	Social Sciences	Bowdoin College
Allen Wells	Professor	Social Sciences	Bowdoin College
Amy Johnson	Professor	Natural Science/Earth and Atmospheric Science	Bowdoin College
Ariella Saiber	Associate Professor	Arts and Humanities	Bowdoin College
Beth Stemmler	Professor	Natural Science	Bowdoin College
Brian Purnell	Associate Professor	Social Sciences	Bowdoin College
Carolyn Wolfenzon Niego	Assistant Professor	Arts and Humanities	Bowdoin College
Charles Dorn	Professor	Education	Bowdoin College
Collin Roesler	Professor	Natural Science/Earth and Atmospheric Science	Bowdoin College
Daniel Stone	Assistant Professor	Economics	Bowdoin College
David Collings	Professor	Arts and Humanities	Bowdoin College
David Conover	Other	Arts and Humanities	Bowdoin College
David Gordon	Professor	Social Sciences	Bowdoin College
David Vail	Professor Emeritus	Economics	Bowdoin College
Elena Cueto-Asin	Associate Professor	Arts and Humanities	Bowdoin College
Elizabeth Pritchard	Professor	Arts and Humanities	Bowdoin College
Emily Peterman	Assistant Professor	Natural Science/Earth and Atmospheric Science	Bowdoin College
Enrique Yepes	Associate Professor	Arts and Humanities	Bowdoin College
Eric Gaze	Instructor or Lecturer	Engineering	Bowdoin College
Erin Curren	Adjunct Faculty	Arts and Humanities	Bowdoin College
Esmeralda Ulloa	Assistant Professor	Social Sciences	Bowdoin College
Eugenia Wheelwright	Instructor or Lecturer	Arts and Humanities	Bowdoin College
Frank Mauceri	Instructor or Lecturer	Arts and Humanities	Bowdoin College
Franklin Burroughs	Professor Emeritus	Arts and Humanities	Bowdoin College
Greg Beckett	Assistant Professor	Social Sciences	Bowdoin College
Gustavo Faveron Patriau	Associate Professor	Arts and Humanities	Bowdoin College
Hadley Horch	Associate Professor	Natural Science	Bowdoin College
Hanetha Vete-Congolo	Professor	Arts and Humanities	Bowdoin College
Jack O'Brien	Assistant Professor	Engineering	Bowdoin College
Jeff Nagle	Professor	Natural Science	Bowdoin College
Jennifer Kosak	Associate Professor	Arts and Humanities	Bowdoin College
John Holt	Professor	Arts and Humanities	Bowdoin College
John Lichter	Professor	Natural Science/Earth and Atmospheric Science	Bowdoin College
John Turner	Professor Emeritus	Arts and Humanities	Bowdoin College
June Vail	Professor	Arts and Humanities	Bowdoin College
Katherine Dauge-Roth	Associate Professor	Arts and Humanities	Bowdoin College
Kristi Olson	Assistant Professor	Arts and Humanities	Bowdoin College
Larry Simon	Associate Professor	Arts and Humanities	Bowdoin College
Laura Henry	Associate Professor	Social Sciences	Bowdoin College
Laura Toma	Associate Professor	Engineering	Bowdoin College
Margaret Boyle	Associate Professor	Arts and Humanities	Bowdoin College
Mary Hunter	Professor	Arts and Humanities	Bowdoin College
Mary Lou Zeeman	Professor	Engineering	Bowdoin College
Michael Birenbaum Quintero	Associate Professor	Arts and Humanities	Bowdoin College
Nadia Celis	Associate Professor	Arts and Humanities	Bowdoin College
Nancy Jennings	Professor Emeritus	Education	Bowdoin College
Nathaniel Wheelwright	Professor	Natural Science/Earth and Atmospheric Science	Bowdoin College
Olufemi Vaughan	Professor	Social Sciences	Bowdoin College
Patrick Rael	Professor	Social Sciences	Bowdoin College
Paul Sarvis	Instructor or Lecturer	Arts and Humanities	Bowdoin College
Rachel Sturman	Associate Professor	Social Sciences	Bowdoin College
Rick Thompson	Professor	Social Sciences	Bowdoin College
Robert Greenlee	Professor	Arts and Humanities	Bowdoin College
Robert Morrison	Professor	Arts and Humanities	Bowdoin College
Sarah Conly	Associate Professor	Arts and Humanities	Bowdoin College
Sarah Mak	Assistant Professor	Social Sciences	Bowdoin College
Scott MacEachern	Professor	Social Sciences	Bowdoin College
Sean Barker	Assistant Professor	Engineering	Bowdoin College
Sree Padma Holt	Assistant Professor	Social Sciences	Bowdoin College
Stephen Majercik	Associate Professor	Engineering	Bowdoin College
Susan Wegner	Associate Professor	Social Sciences	Bowdoin College
Tracy McMullen	Assistant Professor	Arts and Humanities	Bowdoin College
Tricia Welsch	Professor	Arts and Humanities	Bowdoin College
Vineet Shende	Associate Professor	Arts and Humanities	Bowdoin College
Vladimir Douhovnikoff	Assistant Professor	Natural Science	Bowdoin College
William Barker	Professor	Engineering	Bowdoin College
Aaron Passell	Assistant Professor	Social Sciences	Columbia University
Adam H. Sobel	Professor	Natural Science	Columbia University
Adam Weinert	Adjunct Faculty	Arts and Humanities	Columbia University
Aftab Ahmad	Instructor or Lecturer	Arts and Humanities	Columbia University
Akeel Bilgrami	Professor	Arts and Humanities	Columbia University
Aleksandar Boskovic	Instructor or Lecturer	Arts and Humanities	Columbia University
Alexander Alberro	Professor	Arts and Humanities	Columbia University
Alexey Kaplan	Research Scientist, Reseach Professor or Scholar	Natural Science/Earth and Atmospheric Science	Columbia University
Alisa Solomon	Professor	Social Sciences	Columbia University
Allison Busch	Associate Professor	Arts and Humanities	Columbia University
Amy L. Fairchild	Professor	Medicine/Public Health	Columbia University
Amy MacDermott	Professor	Natural Science	Columbia University
Amy Mesa-Jonassen	Assistant Professor	Medicine/Public Health	Columbia University
Ana Marfa Ochoa	Professor	Arts and Humanities	Columbia University
Anders Stephanson	Professor	Social Sciences	Columbia University
Andrea J. Tucher	Other	Social Sciences	Columbia University
Andreas A. Huyssen	Professor	Arts and Humanities	Columbia University
Andrew Eisenberger	Assistant Professor	Medicine/Public Health	Columbia University
Andrew Kanter	Assistant Professor	Medicine/Public Health	Columbia University
Andrew S. Dolkart	Professor	Engineering	Columbia University
Angela A. Aidala	Research Scientist, Reseach Professor or Scholar	Medicine/Public Health	Columbia University
Ann Senghas	Professor	Social Sciences	Columbia University
Anne Paxton	Associate Professor	Medicine/Public Health	Columbia University
Anthony M. Annett	Other	Natural Science/Earth and Atmospheric Science	Columbia University
Anupama Rao	Associate Professor	Social Sciences	Columbia University
Arnold P. Aronson	Professor	Arts and Humanities	Columbia University
Axel Honneth	Professor	Arts and Humanities	Columbia University
Baerbel Hoenisch	Associate Professor	Natural Science/Earth and Atmospheric Science	Columbia University
Benjamin Holtzman	Research Scientist, Reseach Professor or Scholar	Natural Science/Earth and Atmospheric Science	Columbia University
Benjamin S. Orlove	Professor	Social Sciences	Columbia University
Benjamin Steege	Assistant Professor	Arts and Humanities	Columbia University
Binnie Kirshenbaum	Professor	Arts and Humanities	Columbia University
Bob Newton	Research Scientist, Reseach Professor or Scholar	Natural Science/Earth and Atmospheric Science	Columbia University
Brendan Buckley	Research Scientist, Reseach Professor or Scholar	Natural Science/Earth and Atmospheric Science	Columbia University
Brinkley M. Messick	Professor	Social Sciences	Columbia University
Bruce A. Shapiro	Other	Social Sciences	Columbia University
Bruce W. Robbins	Professor	Arts and Humanities	Columbia University
Carl W. Bazil	Professor	Medicine/Public Health	Columbia University
Casey N. Blake	Professor	Social Sciences	Columbia University
Caterina Pizzigoni	Associate Professor	Arts and Humanities	Columbia University
Catherine Fennell	Assistant Professor	Social Sciences	Columbia University
Cathy Popkin	Professor	Arts and Humanities	Columbia University
Charles J. H. Stolar	Professor Emeritus	Medicine/Public Health	Columbia University
Charles K. Armstrong	Professor	Social Sciences	Columbia University
Chisa Hidaka	Instructor or Lecturer	Arts and Humanities	Columbia University
Christia Mercer	Professor	Arts and Humanities	Columbia University
Christian M. Rojas	Professor	Natural Science	Columbia University
Christine Rohde	Associate Professor	Medicine/Public Health	Columbia University
Christopher C. Baswell	Professor	Arts and Humanities	Columbia University
Christopher H. Scholz	Professor	Natural Science/Earth and Atmospheric Science	Columbia University
Chunhua Weng	Associate Professor	Medicine/Public Health	Columbia University
Cindy Gorn	Instructor or Lecturer	Medicine/Public Health	Columbia University
Claudia Schmauss	Associate Professor	Medicine/Public Health	Columbia University
Claudio W. Lomnitz	Professor	Social Sciences	Columbia University
Clifford Stein	Professor	Engineering	Columbia University
Corinne Kirchner	Instructor or Lecturer	Medicine/Public Health	Columbia University
Courtney Bender	Professor	Arts and Humanities	Columbia University
Craig D. Blinderman	Assistant Professor	Medicine/Public Health	Columbia University
Dale Maharidge	Professor	Social Sciences	Columbia University
Dana Pe'er	Associate Professor	Natural Science	Columbia University
Daniel Esposito	Assistant Professor	Engineering	Columbia University
Danielle F. Sedbrook	Associate Professor	Natural Science	Columbia University
Darragh G. Martin	Instructor or Lecturer	Arts and Humanities	Columbia University
David B. Lurie	Associate Professor	Arts and Humanities	Columbia University
David C. Johnston	Professor	Social Sciences	Columbia University
David G. Savage	Professor	Medicine/Public Health	Columbia University
David K. Rosner	Professor	Medicine/Public Health	Columbia University	National Academy of Medicine
David Smiley	Adjunct Faculty	Engineering	Columbia University
David W. Schab	Assistant Professor	Medicine/Public Health	Columbia University
David Walker	Professor	Natural Science/Earth and Atmospheric Science	Columbia University	National Academy of Medicine
Deborah Martinsen	Other	Education	Columbia University
Deborah Valenza	Professor	Social Sciences	Columbia University
Denise Milstein	Instructor or Lecturer	Social Sciences	Columbia University
Diana Hernandez	Assistant Professor	Medicine/Public Health	Columbia University
Dina C. Merrer	Associate Professor	Natural Science	Columbia University
Dorothea von Mucke	Professor	Arts and Humanities	Columbia University
Douglas Almond	Associate Professor	Social Sciences	Columbia University
Douglas Chalmers	Professor Emeritus	Social Sciences	Columbia University
Duncan Menge	Assistant Professor	Natural Science/Earth and Atmospheric Science	Columbia University
Edward J. Tyerman	Assistant Professor	Arts and Humanities	Columbia University
Eitan Grinspun	Associate Professor	engineering	Columbia University
Elisabeth Gawthrop	Other	Social Sciences	Columbia University
Elizabeth A. Povinelli	Professor	Social Sciences	Columbia University
Elizabeth Coker	Adjunct Faculty	Arts and Humanities	Columbia University
Elizabeth Ferriss	Research Scientist, Reseach Professor or Scholar	Natural Science/Earth and Atmospheric Science	Columbia University
Elizabeth Irwin	Associate Professor	Arts and Humanities	Columbia University
Elizabeth Miller	Associate Professor	Natural Science/Earth and Atmospheric Science	Columbia University
Elizabeth R. OuYang	Instructor or Lecturer	Social Sciences	Columbia University
Elke U. Weber	Professor	Business	Columbia University
Elliott Sclar	Professor	Engineering	Columbia University
Ellis Avery	Adjunct Faculty	Arts and Humanities	Columbia University
Eric Foner	Professor	Social Sciences	Columbia University
Erin R. Coughlan	Other	Natural Science/Earth and Atmospheric Science	Columbia University
Ernst Garcon	Assistant Professor	Medicine/Public Health	Columbia University
Eugenia Lean	Associate Professor	Arts and Humanities	Columbia University
Eugenia McGill	Instructor or Lecturer	Social Sciences	Columbia University
Frances A. Champagne	Associate Professor	Social Sciences	Columbia University
Frances Pritchett	Professor Emeritus	Arts and Humanities	Columbia University
Francois Gerard	Assistant Professor	Economics	Columbia University
Frank Costantini	Professor	Medicine/Public Health	Columbia University
Frederica P. Perera	Professor	Medicine/Public Health	Columbia University
Fumiko Nazikian	Instructor or Lecturer	Arts and Humanities	Columbia University
Gauri Viswanathan	Professor	Arts and Humanities	Columbia University
Geoffrey Heal	Professor	Business	Columbia University
Gergely Baics	Assistant Professor	Social Sciences	Columbia University
Gisela Winckler	Research Scientist, Reseach Professor or Scholar	Natural Science/Earth and Atmospheric Science	Columbia University
Graciela Chichilnisky	Professor	Economics	Columbia University
Gray Tuttle	Associate Professor	Arts and Humanities	Columbia University
Greg A. Freyer	Associate Professor	Natural Science/Earth and Atmospheric Science	Columbia University
Greg Bryan	Professor	Natural Science	Columbia University
Gregory Mann	Professor	Social Sciences	Columbia University
Gregory M. Pflugfelder	Associate Professor	Social Sciences	Columbia University
Guohua Li	Professor	Medicine/Public Health	Columbia University
Hamid Dabashi	Professor	Social Sciences	Columbia University
Hana Worthen	Assistant Professor	Arts and Humanities	Columbia University
Harold A. Sackeim	Professor	Medicine/Public Health	Columbia University
Heidi L. Allen	Assistant Professor	Social Sciences	Columbia University
Henry M. Levin	Professor	Education	Columbia University
Henry S. Hess	Associate Professor	Engineering	Columbia University
Herbert J. Gans	Professor Emeritus	Social Sciences	Columbia University
Herbert Sloan	Professor	Social Sciences	Columbia University
Hilary A. Hallett	Assistant Professor	Social Sciences	Columbia University
Hiroshi Mitsumoto	Professor	Medicine/Public Health	Columbia University
Hossain Kamaly	Assistant Professor	Arts and Humanities	Columbia University
Hugh W. Ducklow	Professor	Natural Science/Earth and Atmospheric Science	Columbia University
Irwin E. Redlener	Professor	Medicine/Public Health	Columbia University
J. C. Salyer	Assistant Professor	Social Sciences	Columbia University
J. Paul Martin	Adjunct Faculty	Social Sciences	Columbia University
Jacqueline A. Merrill	Associate Professor	Medicine/Public Health	Columbia University
Jacqueline van Gorkom	Professor	Natural Science	Columbia University
James C. Hone	Professor	Engineering	Columbia University
James Gaherty	Research Scientist, Reseach Professor or Scholar	Natural Science/Earth and Atmospheric Science	Columbia University
James Hansen	Adjunct Faculty	Natural Science/Earth and Atmospheric Science	Columbia University	National Academy of Sciences
James L. Manley	Professor	Natural Science	Columbia University	National Academy of Sciences
Jane Gaines	Professor	Arts and Humanities	Columbia University
Jason E. Smerdon	Research Scientist, Reseach Professor or Scholar	Natural Science/Earth and Atmospheric Science	Columbia University
Jean C. Emond	Professor	Medicine/Public Health	Columbia University
Jean Cohen	Professor	Social Sciences	Columbia University
Jean Howard	Professor	Arts and Humanities	Columbia University
Jean Vadakkan	Instructor or Lecturer	Natural Science	Columbia University
Jeffrey Shaman	Associate Professor	Natural Science/Earth and Atmospheric Science	Columbia University
Jennifer A. Wenzel,	Associate Professor	Arts and Humanities	Columbia University
Jennifer Cole	Adjunct Faculty	Natural Science/Earth and Atmospheric Science	Columbia University
Jesus Rodriguez-Velasco	Professor	Arts and Humanities	Columbia University
Joachim Frank	Professor	Natural Science	Columbia University	National Academy of Sciences
Johannes Urpelainen	Associate Professor	Social Sciences	Columbia University
John H. M. Austin	Professor Emeritus	Medicine/Public Health	Columbia University
John I. Glendinning	Professor	Natural Science	Columbia University
John Markowitz	Professor	Medicine/Public Health	Columbia University
John Pemberton	Associate Professor	Social Sciences	Columbia University
Jonathan Dworkin	Associate Professor	Medicine/Public Health	Columbia University
Jonathan Weiner	Professor	Social Sciences	Columbia University
Jorge Otero-Pailos	Associate Professor	Engineering	Columbia University
Jose C. Moya	Professor	Social Sciences	Columbia University
Jose Gutierrez-Contreras	Assistant Professor	Medicine/Public Health	Columbia University
Joseph Graziano	Professor	Medicine/Public Health	Columbia University
Joseph North	Instructor or Lecturer	Arts and Humanities	Columbia University
Joseph R. Slaughter	Associate Professor	Arts and Humanities	Columbia University
Joshua Drew	Instructor or Lecturer	Natural Science/Earth and Atmospheric Science	Columbia University
Julie Crawford	Professor	Arts and Humanities	Columbia University
Julie Stone Peters	Professor	Arts and Humanities	Columbia University
Karen Barkey	Professor	Social Sciences	Columbia University
Karen F. Brudney	Assistant Professor	Medicine/Public Health	Columbia University
Karen Fairbanks	Professor	Engineering	Columbia University
Karen Froud	Associate Professor	Social Sciences	Columbia University
Karen Smith	Research Scientist, Reseach Professor or Scholar	Natural Science/Earth and Atmospheric Science	Columbia University
Karla Maria S. Rothstein	Adjunct Faculty	Engineering	Columbia University
Katherine Dieckmann	Associate Professor	Arts and Humanities	Columbia University
Katia de Avila Fernandes	Research Scientist, Reseach Professor or Scholar	Natural Science/Earth and Atmospheric Science	Columbia University
Keith J. Sanborn	Professor	Social Sciences	Columbia University
Kendall Thomas	Professor	Law	Columbia University
Kenneth Broad	Adjunct Faculty	Natural Science/Earth and Atmospheric Science	Columbia University
Kenneth D. Miller	Professor	Medicine/Public Health	Columbia University
Kent D. Daniel	Professor	Business	Columbia University
Kevin Fellezs	Assistant Professor	Arts and Humanities	Columbia University
Kevin J. Doughery	Assistant Professor	Education	Columbia University
Klaus H. Jacob	Research Scientist, Reseach Professor or Scholar	Natural Science/Earth and Atmospheric Science	Columbia University
Kyle T. Mandli	Assistant Professor	Engineering	Columbia University
Lars Dietrich	Associate Professor	Natural Science	Columbia University
Latha Venkataraman	Professor	Natural Science	Columbia University
Laurence P. Mark	Associate Professor	Medicine/Public Health	Columbia University
Lesley A. Sharp	Professor	Social Sciences	Columbia University
Liam Paninski	Professor	Engineering	Columbia University
Lila Abu-Lughod	Professor	Social Sciences	Columbia University
Lisa M. Goddard	Research Scientist, Reseach Professor or Scholar	Natural Science/Earth and Atmospheric Science	Columbia University
Lisa S. Tiersten	Professor	Social Sciences	Columbia University
Lydia D. Goehr	Professor	Arts and Humanities	Columbia University
Lydia H. Liu	Professor	Arts and Humanities	Columbia University
Lynn Garafola	Professor	Arts and Humanities	Columbia University
Madeleine Dobie	Associate Professor	Arts and Humanities	Columbia University
Madeleine H. Zelin	Professor	Social Sciences	Columbia University
Maire Jaanus	Professor	Arts and Humanities	Columbia University
Maja Horn	Assistant Professor	Arts and Humanities	Columbia University
Marcel Agueros	Assistant Professor	Natural Science	Columbia University
Marcellus Blount	Associate Professor	Arts and Humanities	Columbia University
Margaret Vandenburg	Instructor or Lecturer	Arts and Humanities	Columbia University
Maria A. Cueto	Adjunct Faculty	Engineering	Columbia University
Maria Diuk-Wasser	Associate Professor	Natural Science/Earth and Atmospheric Science	Columbia University
Maria Hamm de Miguel	Assistant Professor	Medicine/Public Health	Columbia University
Maria Lahuerta	Research Scientist, Reseach Professor or Scholar	Medicine/Public Health	Columbia University
Maria Uriarte	Professor	Natural Science/Earth and Atmospheric Science	Columbia University
Marilyn J. Ivy	Associate Professor	Social Sciences	Columbia University
Marina Cords	Professor	Natural Science/Earth and Atmospheric Science	Columbia University
Mark A. Cane	Professor	Natural Science/Earth and Atmospheric Science	Columbia University	National Academy of Sciences
Marwa Elshakry	Associate Professor	Social Sciences	Columbia University
Mary C. Gordon	Professor	Arts and Humanities	Columbia University
Mary E. Sormanti	Professor	Social Sciences	Columbia University
Maryse Conde	Professor Emeritus	Arts and Humanities	Columbia University
Matthew I. Palmer	Instructor or Lecturer	Natural Science/Earth and Atmospheric Science	Columbia University
Maureen E. Raymo	Research Scientist, Reseach Professor or Scholar	Natural Science/Earth and Atmospheric Science	Columbia University	National Academy of Sciences
Maxine L. Rockoff	Adjunct Faculty	Medicine/Public Health	Columbia University
Maya Tolstoy	Associate Professor	Natural Science/Earth and Atmospheric Science	Columbia University
Meehan Crist	Other	Natural Science/Earth and Atmospheric Science	Columbia University
Megan J. Laverty	Associate Professor	Education	Columbia University
Megan Sykes	Professor	Medicine/Public Health	Columbia University	National Academy of Medicine
Michael A. Borger	Professor	Medicine/Public Health	Columbia University
Michael G. Wessells	Professor	Medicine/Public Health	Columbia University
Michael Grunebaum	Associate Professor	Medicine/Public Health	Columbia University
Michael Harris	Professor	Engineering	Columbia University
Michael I. Weinstein	Professor	Natural Science	Columbia University
Michael J. Devlin	Professor	Medicine/Public Health	Columbia University
Michael S. Schudson	Professor	Social Sciences	Columbia University
Michela Biasutti	Research Scientist, Reseach Professor or Scholar	Natural Science/Earth and Atmospheric Science	Columbia University
Mimi Shirasu-Hiza	Assistant Professor	Medicine/Public Health	Columbia University
Mindy Fullilove	Professor	Medicine/Public Health	Columbia University
Mingfang Ting	Research Scientist, Reseach Professor or Scholar	Natural Science/Earth and Atmospheric Science	Columbia University
Miriam Rabkin	Associate Professor	Medicine/Public Health	Columbia University
Monica Miller	Associate Professor	Arts and Humanities	Columbia University
Moshe Adler	Adjunct Faculty	Engineering	Columbia University
Muhsin al-Musawi	Professor	Arts and Humanities	Columbia University
Nan A. Rothschild	Professor	Social Sciences	Columbia University
Naomi H. Henderson	Research Scientist, Reseach Professor or Scholar	Natural Science/Earth and Atmospheric Science	Columbia University
Nara Milanich	Associate Professor	Arts and Humanities	Columbia University
Nathan Holbert	Assistant Professor	Engineering	Columbia University
Neferti X. M. Tadiar	Professor	Social Sciences	Columbia University
Nicholas H. Fiebach	Professor	Medicine/Public Health	Columbia University
Nico Baumbach	Assistant Professor	Arts and Humanities	Columbia University
Nicole Davi	Adjunct Faculty	Natural Science/Earth and Atmospheric Science	Columbia University
Nina J. Berman	Associate Professor	Social Sciences	Columbia University
Norma V. Graham	Professor	Social Sciences	Columbia University	National Academy of Sciences
Pablo Piccato	Professor	Arts and Humanities	Columbia University
Page Fortna	Professor	Social Sciences	Columbia University
Paige West	Professor	Social Sciences	Columbia University
Pamela A. Koch	Associate Professor	Medicine/Public Health	Columbia University
Patricia A. Dailey	Associate Professor	Arts and Humanities	Columbia University
Patrick Gallagher	Professor	Engineering	Columbia University
Paul Siegel	Assistant Professor	Engineering	Columbia University
Paula L. M. Gonzalez	Research Scientist, Reseach Professor or Scholar	Natural Science/Earth and Atmospheric Science	Columbia University
Peter A. Messeri	Professor	Medicine/Public Health	Columbia University
Peter B. DeMenocal	Professor	Natural Science/Earth and Atmospheric Science	Columbia University
Peter Bearman	Professor	Social Sciences	Columbia University	National Academy of Sciences
Peter Connor	Professor	Arts and Humanities	Columbia University
Peter E. Libre	Assistant Professor	Medicine/Public Health	Columbia University
Peter Kelemen	Professor	Natural Science/Earth and Atmospheric Science	Columbia University	National Academy of Sciences
Peter L. Strauss	Professor	Law	Columbia University
Peter Smith	Professor Emeritus	Arts and Humanities	Columbia University
Philip Kitcher	Professor	Arts and Humanities	Columbia University
Quarraisha A Karim	Associate Professor	Medicine/Public Health	Columbia University	National Academy of Medicine
Radley Horton	Research Scientist, Reseach Professor or Scholar	Natural Science/Earth and Atmospheric Science	Columbia University
Ralph Ghoche	Assistant Professor	Engineering	Columbia University
Rebecca M. Jordan-Young	Associate Professor	Social Sciences	Columbia University
Reinhold Martin	Professor	Engineering	Columbia University
Rhiannon Stephens	Assistant Professor	Arts and Humanities	Columbia University
Richard Seager	Research Scientist, Reseach Professor or Scholar	Natural Science/Earth and Atmospheric Science	Columbia University
Rita Charon	Professor	Medicine/Public Health	Columbia University
Robert Hymes	Professor	Social Sciences	Columbia University
Robert A. F. Thurman	Professor	Arts and Humanities	Columbia University
Robert Anderson	Research Scientist, Reseach Professor or Scholar	Natural Science/Earth and Atmospheric Science	Columbia University
Robert Beauregard	Professor	Engineering	Columbia University
Robert Burke	Professor	Medicine/Public Health	Columbia University
Robert Hodrick	Professor	Business	Columbia University
Rocco A. Servedio	Associate Professor	engineering	Columbia University
Ronald A. Feldman	Professor	Social Sciences	Columbia University
Rosalind C. Morris	Professor	Social Sciences	Columbia University
Ross 0. Hamilton	Professor	Arts and Humanities	Columbia University
Ryan P. Abernathey	Assistant Professor	Natural Science/Earth and Atmospheric Science	Columbia University
Sandra Goldmark	Assistant Professor	Arts and Humanities	Columbia University
Sandra Luckow	Adjunct Faculty	Arts and Humanities	Columbia University
Sara F. Tjossem	Instructor or Lecturer	Social Sciences	Columbia University
Scott Marble	Adjunct Faculty	Engineering	Columbia University
Severine Autesserre	Assistant Professor	Social Sciences	Columbia University
Shahid Naeem	Professor	Natural Science/Earth and Atmospheric Science	Columbia University
Shamus Khan	Associate Professor	Social Sciences	Columbia University
Sharon Schwartz	Professor	Medicine/Public Health	Columbia University
Sheldon Marc Feldman	Associate Professor	Medicine/Public Health	Columbia University
Sheldon Pollock	Professor	Arts and Humanities	Columbia University
Shelly A. Silver	Associate Professor	Arts and Humanities	Columbia University
Shiv Someshwar	Research Scientist, Reseach Professor or Scholar	Natural Science/Earth and Atmospheric Science	Columbia University
Stan Jacobs	Research Scientist, Reseach Professor or Scholar	Natural Science/Earth and Atmospheric Science	Columbia University
Stathis Gourgouris	Professor	Arts and Humanities	Columbia University
Stephen E. Zebiak	Research Scientist, Reseach Professor or Scholar	Natural Science/Earth and Atmospheric Science	Columbia University
Steven Chillrud	Research Scientist, Reseach Professor or Scholar	Natural Science/Earth and Atmospheric Science	Columbia University
Steven Gregory	Professor	Social Sciences	Columbia University
Stuart Braman	Adjunct Faculty	Natural Science/Earth and Atmospheric Science	Columbia University
Stuart Firestein	Professor	Natural Science/Earth and Atmospheric Science	Columbia University
Sumit Mohan	Assistant Professor	Medicine/Public Health	Columbia University
Suresh Naidu	Associate Professor	Social Sciences	Columbia University
Susan Bernofsky	Associate Professor	Arts and Humanities	Columbia University
Susan Crane	Professor	Arts and Humanities	Columbia University
Susan S. Witte	Associate Professor	Social Sciences	Columbia University
Susie Hoffman	Associate Professor	Medicine/Public Health	Columbia University
Sylvere Lotringer	Professor Emeritus	Arts and Humanities	Columbia University
Tanya M. Ellman	Research Scientist, Reseach Professor or Scholar	Medicine/Public Health	Columbia University
Tarik C. Amar	Assistant Professor	Social Sciences	Columbia University
Taylor Carman	Professor	Arts and Humanities	Columbia University
Terry A. Plank	Professor	Natural Science/Earth and Atmospheric Science	Columbia University	National Academy of Sciences
Thai S. Jones	Other	Arts and Humanities	Columbia University
Thomas S. Kalin	Professor	Arts and Humanities	Columbia University
Thomas Yarnall	Other	Arts and Humanities	Columbia University
Thomas J. Garrett	Professor	Medicine/Public Health	Columbia University
Tian Zheng	Associate Professor	Engineering	Columbia University
Timothy Donnelly	Associate Professor	Arts and Humanities	Columbia University
Timothy Hall	Adjunct Faculty	Engineering	Columbia University
Timothy Mitchell	Professor	Arts and Humanities	Columbia University
Tobias Wilke	Assistant Professor	Arts and Humanities	Columbia University
Todd Gitlin	Professor	Social Sciences	Columbia University
Tomoaki Kato	Professor	Medicine/Public Health	Columbia University
Trey Ellis	Associate Professor	Arts and Humanities	Columbia University
Unni K. Karunakara	Assistant Professor	Medicine/Public Health	Columbia University
Van C. Tran	Assistant Professor	Social Sciences	Columbia University
Vicki Lens	Associate Professor	Social Sciences	Columbia University
Victoria de Grazia	Professor	Social Sciences	Columbia University
Victoria Frye	Assistant Professor	Medicine/Public Health	Columbia University
Wael Hallaq	Professor	Arts and Humanities	Columbia University
Walter Bock	Professor	Natural Science	Columbia University
Walter D. Neumann	Professor	Engineering	Columbia University
Walter E. Baethgen	Research Scientist, Reseach Professor or Scholar	Natural Science/Earth and Atmospheric Science	Columbia University
Wayne L. Proudfoot	Professor	Arts and Humanities	Columbia University
Wendy Chavkin	Instructor or Lecturer	Medicine/Public Health	Columbia University
Wendy Katz	Instructor or Lecturer	Medicine/Public Health	Columbia University
William B. Worthen	Professor	Arts and Humanities	Columbia University
William Chapman Sharpe	Professor	Arts and Humanities	Columbia University
William Gaudelli	Associate Professor	Arts and Humanities	Columbia University
Yan Zheng	Adjunct Faculty	Natural Science/Earth and Atmospheric Science	Columbia University
Yochanan Kushnir	Research Scientist, Reseach Professor or Scholar	Natural Science/Earth and Atmospheric Science	Columbia University
Zoe Crossland	Associate Professor	Social Sciences	Columbia University
Adam Lifshey	Associate Professor	Arts and Humanities	Georgetown University
Amy Leonard	Associate Professor	Social Sciences	Georgetown University
Andrew Sobanet	Associate Professor	Arts and Humanities	Georgetown University
Angel Gii-Ordonez	Adjunct Faculty	Arts and Humanities	Georgetown University
Anna D. Johnson	Assistant Professor	Social Sciences	Georgetown University
Anna von der Goltz	Associate Professor	Social Sciences	Georgetown University
Anne O'Neii-Henry	Assistant Professor	Arts and Humanities	Georgetown University
Anne Rosenwald	Associate Professor	Natural Science	Georgetown University
Ashley L. Cohen	Assistant Professor	Arts and Humanities	Georgetown University
Brian Hochman	Assistant Professor	Arts and Humanities	Georgetown University
Bryce Huebner	Associate Professor	Arts and Humanities	Georgetown University
Cailin Parsons	Assistant Professor	Arts and Humanities	Georgetown University
Caroline Wellbery	Professor	Medicine/Public Health	Georgetown University
Carolyn Forche	Professor	Arts and Humanities	Georgetown University
Christine Evans	Assistant Professor	Arts and Humanities	Georgetown University
Dagomar Degroot	Assistant Professor	Social Sciences	Georgetown University
Dana Luciano	Associate Professor	Arts and Humanities	Georgetown University
Daniel A. Madigan	Associate Professor	Arts and Humanities	Georgetown University
Daniel Shore	Associate Professor	Arts and Humanities	Georgetown University
David Bronstein	Assistant Professor	Arts and Humanities	Georgetown University
David Gewanter	Professor	Arts and Humanities	Georgetown University
David W. Lightfoot	Professor	Social Sciences	Georgetown University
Deborah Lesko Baker	Professor	Arts and Humanities	Georgetown University
Denise Brennan	Associate Professor	Social Sciences	Georgetown University
Duncan Wu	Professor	Arts and Humanities	Georgetown University
Edward M. Barrows	Professor	Natural Science	Georgetown University
Edward Maloney	Associate Professor	Education	Georgetown University
Elena Herburger	Associate Professor	Arts and Humanities	Georgetown University
Eli McCarthy	Adjunct Faculty	Social Sciences	Georgetown University
Emily Francomano	Associate Professor	Arts and Humanities	Georgetown University
Fathali Moghaddam	Adjunct Faculty	Social Sciences	Georgetown University
Francisca Cho	Associate Professor	Arts and Humanities	Georgetown University
Frederick Ruf	Associate Professor	Arts and Humanities	Georgetown University
Gay Gibson Cima	Professor	Arts and Humanities	Georgetown University
George E. Shambaugh	Associate Professor	Social Sciences	Georgetown University
Gerard Mannion	Professor	Arts and Humanities	Georgetown University
Gina Wimp	Associate Professor	Natural Science	Georgetown University
Gretchen E. Henderson	Instructor or Lecturer	Arts and Humanities	Georgetown University
Henry Schwarz	Professor	Arts and Humanities	Georgetown University
James Mattingly	Associate Professor	Arts and Humanities	Georgetown University
James Olsen	Adjunct Faculty	Arts and Humanities	Georgetown University
Jennifer Fox	Assistant Professor	Natural Science	Georgetown University
Jennifer Natalya Fink	Associate Professor	Arts and Humanities	Georgetown University
Joanna Lewis	Associate Professor	Social Sciences	Georgetown University
Joanne Rappaport	Professor	Social Sciences	Georgetown University
Joe Napolitano	Other	Arts and Humanities	Georgetown University
John C. Hirsh	Professor	Arts and Humanities	Georgetown University
John F. Haught	Professor Emeritus	Arts and Humanities	Georgetown University
John R McNeill	Professor	Social Sciences	Georgetown University
Jordan Sand	Professor	Social Sciences	Georgetown University
Joseph A. McCartin	Professor	Social Sciences	Georgetown University
Judith Lichtenberg	Professor	Arts and Humanities	Georgetown University
Julia A. Lamm	Associate Professor	Arts and Humanities	Georgetown University
Julia Watts Belser	Assistant Professor	Arts and Humanities	Georgetown University
Katherine Chandler,	Assistant Professor	Social Sciences	Georgetown University
Katherine Withy	Assistant Professor	Arts and Humanities	Georgetown University
Kathleen McNamara	Associate Professor	Social Sciences	Georgetown University
Kerry Danner-McDonald	Adjunct Faculty	Arts and Humanities	Georgetown University
Kristin Primus	Assistant Professor	Arts and Humanities	Georgetown University
Laura Anderko	Associate Professor	Medicine/Public Health	Georgetown University
Laura Benedetti	Professor	Arts and Humanities	Georgetown University
Laura Guidry-Grimes	Other	Arts and Humanities	Georgetown University
Lisa Heinzerling	Professor	Law	Georgetown University
Madison Powers	Professor	Arts and Humanities	Georgetown University
Mahendran Velauthapillai	Professor	Engineering	Georgetown University
Manus Patten	Assistant Professor	Natural Science	Georgetown University
Marc Howard	Professor	Social Sciences	Georgetown University
Margaret Little	Associate Professor	Arts and Humanities	Georgetown University
Mark Lance	Professor	Social Sciences	Georgetown University
Mark Sicoli	Assistant Professor	Social Sciences	Georgetown University
Martha Weiss	Associate Professor	Natural Science	Georgetown University
Matthew Pavesich	Assistant Professor	Arts and Humanities	Georgetown University
Maureen Corrigan	Professor	Arts and Humanities	Georgetown University
Maurice Jackson	Associate Professor	Social Sciences	Georgetown University
McKay Holland	Other	Arts and Humanities	Georgetown University
Melissa Bradley	Professor	Business	Georgetown University
Micah Sherr	Associate Professor	Engineering	Georgetown University
Michael A Hickey	Assistant Professor	Natural Science	Georgetown University
Michael Kazin	Professor	Social Sciences	Georgetown University
Michael Loadenthal	Adjunct Faculty	Social Sciences	Georgetown University
Michael Randall Barnes	Other	Arts and Humanities	Georgetown University
Michelle Wang	Assistant Professor	Social Sciences	Georgetown University
Mike Osborne	Assistant Professor	Social Sciences	Georgetown University
Motoko Omori	Adjunct Faculty	Social Sciences	Georgetown University
Mubbashir Rizvi	Assistant Professor	Social Sciences	Georgetown University
Nathan K. Hensley	Assistant Professor	Arts and Humanities	Georgetown University
Nicole Rizzuto	Assistant Professor	Arts and Humanities	Georgetown University
Ori Soltes	Instructor or Lecturer	Arts and Humanities	Georgetown University
Pamela Fox	Professor	Arts and Humanities	Georgetown University
Patricia Vieira	Associate Professor	Arts and Humanities	Georgetown University
Patrick R. O'Malley	Associate Professor	Arts and Humanities	Georgetown University
Paul D. Roepe	Professor	Natural Science	Georgetown University
Penn Szittya	Professor Emeritus	Arts and Humanities	Georgetown University
Peter Armbruster	Associate Professor	Natural Science	Georgetown University
Pierre Taminiaux	Professor	Arts and Humanities	Georgetown University
Rama Ramamurthy	Professor	Business	Georgetown University
Randall Amster	Professor	Social Sciences	Georgetown University
Rebecca Boylan	Instructor or Lecturer	Arts and Humanities	Georgetown University
Rebecca Kukla	Professor	Social Sciences	Georgetown University
Rebecca M. Ryan	Assistant Professor	Social Sciences	Georgetown University
Ricardo Ortiz	Associate Professor	Arts and Humanities	Georgetown University
Robynn Stilwell	Associate Professor	Arts and Humanities	Georgetown University
Rochelle E. Tractenberg	Associate Professor	Medicine/Public Health	Georgetown University
Rodrigo Maillard	Assistant Professor	Natural Science	Georgetown University
Rosemary Sokas	Professor	Social Sciences	Georgetown University
Sandra Horvath-Peterson	Associate Professor	Social Sciences	Georgetown University
Sarah McNamer	Associate Professor	Arts and Humanities	Georgetown University
Shiloh Krupar	Associate Professor	Social Sciences	Georgetown University
Steven R. Sabat	Professor	Social Sciences	Georgetown University
Sylvia W. Onder	Professor	Arts and Humanities	Georgetown University
Sylvie Durmelat	Associate Professor	Arts and Humanities	Georgetown University
Terry Pinkard	Professor	Arts and Humanities	Georgetown University
Thomas Kerch	Adjunct Faculty	Social Sciences	Georgetown University
Tom Mulherin	Adjunct Faculty	Arts and Humanities	Georgetown University
Tomoko Steen	Professor	Medicine/Public Health	Georgetown University
Vince WinklerPrins	Associate Professor	Medicine/Public Health	Georgetown University
Wesley N. Mathews Jr.	Associate Professor	Natural Science	Georgetown University
William Blattner	Professor	Arts and Humanities	Georgetown University
William J. Gallagher	Assistant Professor	Medicine/Public Health	Georgetown University
YuYe Jay Tong	Professor	Natural Science	Georgetown University
Yvonne Haddad	Professor	Social Sciences	Georgetown University
Aaron Bernstein	Instructor or Lecturer	Medicine/Public Health	Harvard University
Adriana Gutillrrez	Instructor or Lecturer	Arts and Humanities	Harvard University
Afsaneh Najmabadi	Professor	Social Sciences	Harvard University
Ajantha Subramanian	Professor	Social Sciences	Harvard University
Alan Zaslavsky	Professor	Medicine/Public Health	Harvard University
Alberto Ascherio	Professor	Medicine/Public Health	Harvard University
Alex Bloemendal	Other	Engineering	Harvard University
Alfonso Caramazza	Professor	Social Sciences	Harvard University
Alice Jardine	Professor	Arts and Humanities	Harvard University
Anders Niiiir	Professor	Medicine/Public Health	Harvard University
Andrew Berry	Instructor or Lecturer	Natural Science/Earth and Atmospheric Science	Harvard University
Andrew Jewett	Associate Professor	Social Sciences	Harvard University
Anne Harrington	Professor	Arts and Humanities	Harvard University
Bany Dom	Instructor or Lecturer	Medicine/Public Health	Harvard University
Barbara Hamm	Instructor or Lecturer	Medicine/Public Health	Harvard University
Barry Mazur	Professor	Engineering	Harvard University	National Academy of Sciences
Bernhard Nickel	Professor	Arts and Humanities	Harvard University
Bjorn R. Olsen	Professor	Medicine/Public Health	Harvard University
Brian D. Farrell	Professor	Natural Science/Earth and Atmospheric Science	Harvard University
Bruce Hay	Professor	Law	Harvard University
Cannen Amold-Biucchi	Instructor or Lecturer	Arts and Humanities	Harvard University
Carl Wunsch	Professor	Natural Science/Earth and Atmospheric Science	Harvard University	National Academy of Sciences
Caroline Light	Instructor or Lecturer	Social Sciences	Harvard University
Charles Harris	Professor Emeritus	Engineering	Harvard University
Christine Desan	Professor	Law	Harvard University
Christopher Foote	Professor	Economics	Harvard University
Christopher Jencks	Professor	Social Sciences	Harvard University
Christopher Walsh	Professor	Medicine/Public Health	Harvard University
Christopher Winship	Professor	Social Sciences	Harvard University
Courtney B. Cazden	Professor Emeritus	Education	Harvard University
Dan McKanan	Instructor or Lecturer	Arts and Humanities	Harvard University
Daniel A. Goodenough	Professor Emeritus	Medicine/Public Health	Harvard University
Daniel Donoghue	Professor	Arts and Humanities	Harvard University
Daniel Kahne	Professor	Natural Science	Harvard University
Daniel Lord Smail	Professor	Social Sciences	Harvard University
Danny Milner	Associate Professor	Medicine/Public Health	Harvard University
David Armitage	Professor	Social Sciences	Harvard University
David Bor	Associate Professor	Medicine/Public Health	Harvard University
David Charbonneau	Professor	Natural Science	Harvard University
David Elmer	Professor	Arts and Humanities	Harvard University
David Foster	Instructor or Lecturer	Natural Science/Earth and Atmospheric Science	Harvard University
David Hoffman	Instructor or Lecturer	Law	Harvard University
David Johnston	Associate Professor	Natural Science	Harvard University
David Keith	Professor	Engineering	Harvard University
David King	Instructor or Lecturer	Social Sciences	Harvard University
Dennis Gaitsgory	Professor	Engineering	Harvard University
Diana Eck	Professor	Social Sciences	Harvard University
Doris Sommer	Professor	Arts and Humanities	Harvard University
Dudley Herschbach	Professor Emeritus	Natural Science	Harvard University	National Academy of Sciences
Duncan Kennedy	Professor	Law	Harvard University
Edward Seldin	Associate Professor	Medicine/Public Health	Harvard University
Elena Kramer	Professor	Natural Science	Harvard University
Elizabeth Bartholet	Professor	Law	Harvard University
Elizabeth Parsons	Instructor or Lecturer	Medicine/Public Health	Harvard University
Emily Riehl	Other	Engineering	Harvard University
Emma Dench	Professor	Arts and Humanities	Harvard University
Eric Chivian	Professor Emeritus	Medicine/Public Health	Harvard University
Eric Jacobson	Instructor or Lecturer	Medicine/Public Health	Harvard University
Eric Rentschler	Professor	Arts and Humanities	Harvard University
Eugene Beresin	Professor	Medicine/Public Health	Harvard University
Everett Mendelsohn	Professor Emeritus	Social Sciences	Harvard University
Federico Capasso	Professor	Natural Science	Harvard University
Francesco Erspamer	Professor	Arts and Humanities	Harvard University
Francis X. Clooney, S.J.	Professor	Arts and Humanities	Harvard University
George Moseley	Instructor or Lecturer	Medicine/Public Health	Harvard University
Gerald Frug	Professor	Law	Harvard University
Giiven Giizeldere	Instructor or Lecturer	Arts and Humanities	Harvard University
Gisela Striker	Professor Emeritus	Arts and Humanities	Harvard University
Gonzalo Giribet	Professor	Arts and Humanities	Harvard University
Goodarz Danaei	Assistant Professor	Medicine/Public Health	Harvard University
Harvey Cox	Professor Emeritus	Arts and Humanities	Harvard University
Heather Hill	Professor	Education	Harvard University
Helen Vendler	Professor	Arts and Humanities	Harvard University
Howard Gardner	Professor	Education	Harvard University
Hunter Gehlbach	Associate Professor	Education	Harvard University
J. Wesley Boyd	Assistant Professor	Medicine/Public Health	Harvard University
James Engell	Professor	Arts and Humanities	Harvard University
James G. Anderson	Professor	Natural Science/Earth and Atmospheric Science	Harvard University
James Hanken	Professor	Arts and Humanities	Harvard University
James Kloppenberg	Professor	Social Sciences	Harvard University
James McCarthy	Professor	Natural Science/Earth and Atmospheric Science	Harvard University
James Recht	Assistant Professor	Medicine/Public Health	Harvard University
James Simpson	Professor	Arts and Humanities	Harvard University
Jane Mansbridge	Professor	Social Sciences	Harvard University
Janet Beizer	Professor	Arts and Humanities	Harvard University
Janet Halley	Professor	Law	Harvard University
Jason Backfield	Professor	Social Sciences	Harvard University
Jason Weisfeld	Instructor or Lecturer	Medicine/Public Health	Harvard University
Jay Youngdahl	Other	Social Sciences	Harvard University
Jeremiah Schuur	Assistant Professor	Medicine/Public Health	Harvard University
John E. McDonough	Professor	Medicine/Public Health	Harvard University
John Huth	Professor	Natural Science	Harvard University
John Spengler	Professor	Medicine/Public Health	Harvard University
John Stauffer	Professor	Social Sciences	Harvard University
John Wakeley	Professor	Natural Science/Earth and Atmospheric Science	Harvard University
John Womack, Jr.	Professor Emeritus	Social Sciences	Harvard University
Joji Suzuki	Instructor or Lecturer	Medicine/Public Health	Harvard University
Jon Hanson	Professor	Law	Harvard University
Jonathan Losos	Professor	Social Sciences	Harvard University
Jorie Graham	Professor	Arts and Humanities	Harvard University
Jose Rabasa	Professor	Arts and Humanities	Harvard University
Joseph Brain	Professor	Medicine/Public Health	Harvard University
Joyce E. Chaplin	Professor	Social Sciences	Harvard University
Judith Herman	Professor	Medicine/Public Health	Harvard University
Julie Buckler	Professor	Arts and Humanities	Harvard University
Justin Junge	Instructor or Lecturer	Social Sciences	Harvard University
Kathleen Coleman	Professor	Arts and Humanities	Harvard University
Ken Nakayama	Professor	Social Sciences	Harvard University
Kenneth Mack	Professor	Law	Harvard University
Kenneth Winston	Instructor or Lecturer	Social Sciences	Harvard University
Kevin Caffrey	Instructor or Lecturer	Social Sciences	Harvard University
L Mahadevan	Professor	Natural Science	Harvard University
Laura Nasrallah	Professor	Arts and Humanities	Harvard University
Lawrence Buell	Professor Emeritus	Arts and Humanities	Harvard University
Leah Price	Professor	Arts and Humanities	Harvard University
Lisa Berkman	Professor	Medicine/Public Health	Harvard University
Luis Fernandez-Cifuentes	Professor	Arts and Humanities	Harvard University
Mark Schiefsky	Professor	Arts and Humanities	Harvard University
Mark Tushnet	Professor	Law	Harvard University
Marshall Ganz	Instructor or Lecturer	Social Sciences	Harvard University
Martha Ellen Katz	Instructor or Lecturer	Medicine/Public Health	Harvard University
Mary C. Waters	Professor	Social Sciences	Harvard University
Mary Lewis	Professor	Social Sciences	Harvard University
Matthew Bonds	Research Scientist, Reseach Professor or Scholar	Medicine/Public Health	Harvard University
Matthew Boyle	Professor	Arts and Humanities	Harvard University
Matthew H. Liang	Professor	Medicine/Public Health	Harvard University
Matthew Reece	Assistant Professor	Natural Science	Harvard University
May Moreshet	Other	Medicine/Public Health	Harvard University
Melissa Bartick	Assistant Professor	Medicine/Public Health	Harvard University
Melissa Coco	Other	Medicine/Public Health	Harvard University
Meredith Rosenthal	Professor	Social Sciences	Harvard University
Michael Herzfeld	Professor	Social Sciences	Harvard University
Michael Klagsbrun	Professor	Medicine/Public Health	Harvard University
Michele Lamont	Professor	Social Sciences	Harvard University
Nancy Krieger	Professor	Medicine/Public Health	Harvard University
Nancy L. Rosenblum	Professor	Medicine/Public Health	Harvard University
Naomi Oreskes	Professor	Natural Science/Earth and Atmospheric Science	Harvard University
Natasha Warikoo	Assistant Professor	Education	Harvard University
Neil Brenner	Professor	Arts and Humanities	Harvard University
Niall G. Kirkwood	Professor	Engineering	Harvard University
Nicco Mele	Adjunct Faculty	Social Sciences	Harvard University
Nicholas Watson	Professor	Social Sciences	Harvard University
Nonnan Daniels	Professor	Medicine/Public Health	Harvard University
Patrice Higonnet	Professor	Social Sciences	Harvard University
Paul F. Hoffman	Professor Emeritus	Natural Science/Earth and Atmospheric Science	Harvard University
Paulina Peters	Professor Emeritus	Social Sciences	Harvard University
Peter Burgard	Professor	Arts and Humanities	Harvard University
Peter Sacks	Professor	Arts and Humanities	Harvard University
Rachel Flanders	Instructor or Lecturer	Medicine/Public Health	Harvard University
Rachel Gillett	Instructor or Lecturer	Arts and Humanities	Harvard University
Rachel Nardin	Assistant Professor	Medicine/Public Health	Harvard University
Rebecca Rogers	Other	Medicine/Public Health	Harvard University
Richard F. Thomas	Professor	Arts and Humanities	Harvard University
Richard Levins	Professor	Medicine/Public Health	Harvard University
Richard Parker	Instructor or Lecturer	Social Sciences	Harvard University
Robert Husson	Professor	Medicine/Public Health	Harvard University
Robert Levin	Professor	Arts and Humanities	Harvard University
Robin Bernstein	Professor	Social Sciences	Harvard University
Rodrigo Chacan	Instructor or Lecturer	Social Sciences	Harvard University
Rohini Pande	Professor	Social Sciences	Harvard University
Sally Thompson	Instructor or Lecturer	Medicine/Public Health	Harvard University
Samuel Myers	Instructor or Lecturer	Medicine/Public Health	Harvard University
Sarah Dryden-Peterson	Assistant Professor	Education	Harvard University
Sergio Delgado	Assistant Professor	Arts and Humanities	Harvard University
Sharon Howell	Instructor or Lecturer	Arts and Humanities	Harvard University
Shelley Tworoger	Associate Professor	Medicine/Public Health	Harvard University
Shoshana Zuboff	Professor Emeritus	Business	Harvard University
Soha Bayoumi	Instructor or Lecturer	Arts and Humanities	Harvard University
Sophia Roosth	Assistant Professor	Social Sciences	Harvard University
Stacey Combes	Associate Professor	Natural Science/Earth and Atmospheric Science	Harvard University
Stephanie Sandler	Professor	Arts and Humanities	Harvard University
Stephen Alan Marglin	Professor	Economics	Harvard University
Stephen Chong	Associate Professor	Engineering	Harvard University
Stephen Harrison	Professor	Medicine/Public Health	Harvard University
Steve Jarding	Instructor or Lecturer	Social Sciences	Harvard University
Steven Shapin	Research Scientist, Reseach Professor or Scholar	Social Sciences	Harvard University
Sukhada Fadnavis	Other	Engineering	Harvard University
Susan Yelin	Other	Natural Science	Harvard University
Susanna Siegel	Professor	Arts and Humanities	Harvard University
Suzanne Walker	Professor	Medicine/Public Health	Harvard University
Tamara Kay	Associate Professor	Social Sciences	Harvard University
Thomas B.F. Cummins	Professor	Arts and Humanities	Harvard University
Thomas Hayes	Instructor or Lecturer	Natural Science	Harvard University
Thomas Walz	Professor	Medicine/Public Health	Harvard University
Timothy McCarthy	Instructor or Lecturer	Social Sciences	Harvard University
Tom Conley	Professor	Arts and Humanities	Harvard University
Virginia Greene	Professor	Arts and Humanities	Harvard University
Wade Harper	Professor	Medicine/Public Health	Harvard University
Willa Miller	Instructor or Lecturer	Arts and Humanities	Harvard University
William Schmitt	Assistant Professor	Medicine/Public Health	Harvard University
William Todd	Professor	Arts and Humanities	Harvard University
Zachary Zevitas	Instructor or Lecturer	Natural Science/Earth and Atmospheric Science	Harvard University
Abby Lippman	Professor Emeritus	Medicine/Public Health	McGill University
Adrienne Hurley	Associate Professor	Social Sciences	McGill University
Ahmed EI-Geneidy	Associate Professor	Social Sciences	McGill University
Alanna Thain	Associate Professor	Arts and Humanities	McGill University
Alberto Perez-Gomez	Professor	Engineering	McGill University
Alia Al-Saji	Associate Professor	Arts and Humanities	McGill University
Alison Laywine	Associate Professor	Arts and Humanities	McGill University
Amanda Holmes	Associate Professor	Social Sciences	McGill University
Andrew Hendry	Professor	Natural Science	McGill University
Andrew Piper	Professor	Arts and Humanities	McGill University
Anna Berman	Assistant Professor	Arts and Humanities	McGill University
Annick Chapdelaine	Associate Professor	Arts and Humanities	McGill University
Anny Guimont	Instructor or Lecturer	Arts and Humanities	McGill University
Anthony Ricciardi	Associate Professor	Natural Science	McGill University
Ara Osterweil	Assistant Professor	Arts and Humanities	McGill University
Arash Abizadeh	Associate Professor	Social Sciences	McGill University
Becky Lentz	Assistant Professor	Social Sciences	McGill University
Berkeley Kaite	Associate Professor	Arts and Humanities	McGill University
Brian Lewis	Professor	Social Sciences	McGill University
Bronwen Low	Associate Professor	Education	McGill University
Bruce Case	Associate Professor	Medicine/Public Health	McGill University
Bruce Reed	Professor	Engineering	McGill University
Carlos Fraenkel	Associate Professor	Social Sciences	McGill University
Carrie Rentschler	Associate Professor	Social Sciences	McGill University
Catherine Dea	Adjunct Faculty	Medicine/Public Health	McGill University
Catherine Potvin	Professor	Natural Science	McGill University
Celina Le Bourdais	Professor	Social Sciences	McGill University
Christine Ross	Professor	Social Sciences	McGill University
Christopher Barrington-Leigh	Assistant Professor	Economics	McGill University
Claude Crepeau	Associate Professor	engineering	McGill University
Daniel Rueck	Instructor or Lecturer	Arts and Humanities	McGill University
Daniel Weinstock	Professor	Law	McGill University
Darin Barne	Associate Professor	Arts and Humanities	McGill University
David Davies	Professor	Arts and Humanities	McGill University
David Hensley	Associate Professor	Arts and Humanities	McGill University
Daviken Studnicki Gizbert	Associate Professor	Social Sciences	McGill University
Derek Nystrom	Associate Professor	Arts and Humanities	McGill University
Devi Banerjee	Assistant Professor	Medicine/Public Health	McGill University
Dik Harris	Professor Emeritus	Natural Science	McGill University
Donald Attwood	Professor Emeritus	Social Sciences	McGill University
Dror Etzion	Associate Professor	Business	McGill University
Eli Maclaren	Assistant Professor	Arts and Humanities	McGill University
Elizabeth Elboume	Associate Professor	Arts and Humanities	McGill University
Elizabeth Robinson	Research Scientist, Reseach Professor or Scholar	Medicine/Public Health	McGill University
Elsbeth Heaman	Associate Professor	Social Sciences	McGill University
Eran Shor	Associate Professor	Social Sciences	McGill University
Eric Caplan	Associate Professor	Social Sciences	McGill University
Eric Latimer	Professor	Medicine/Public Health	McGill University
Erica Moodie	Professor	Medicine/Public Health	McGill University
Eugenio Bolongaro	Associate Professor	Social Sciences	McGill University
Fiona J. Benson	Associate Professor	Education	McGill University
Fiona Ritchie	Associate Professor	Arts and Humanities	McGill University
Francois Fagotto	Associate Professor	Natural Science	McGill University
Frederic Fabry	Associate Professor	Natural Science/Earth and Atmospheric Science	McGill University
Gabriella Coleman	Associate Professor	Social Sciences	McGill University
Gerald van Gurp	Assistant Professor	Medicine/Public Health	McGill University
Gergely Lukacs	Professor	Medicine/Public Health	McGill University
Gilles Paradis	Instructor or Lecturer	Medicine/Public Health	McGill University
Grace Fong	Professor	Arts and Humanities	McGill University
Gregory Mikkelson	Associate Professor	Arts and Humanities	McGill University
Gwen Bennett	Assistant Professor	Social Sciences	McGill University
Hank Knox	Associate Professor	Arts and Humanities	McGill University
Hans Larsson	Associate Professor	Natural Science	McGill University
Hasana Sharp	Associate Professor	Arts and Humanities	McGill University
Henry Mintzberg	Professor	Business	McGill University
Ian Gold	Associate Professor	Arts and Humanities	McGill University
Ian H Henderson	Associate Professor	Arts and Humanities	McGill University
Irene Gregory-Eaves	Associate Professor	Natural Science	McGill University
Ismael Vaccaro	Associate Professor	Social Sciences	McGill University
James Cline	Professor	Natural Science	McGill University
James Coulton	Professor	Medicine/Public Health	McGill University
James McGilvray	Professor Emeritus	Arts and Humanities	McGill University
Jason Opal	Associate Professor	Social Sciences	McGill University
Jay Kaufman	Professor	Medicine/Public Health	McGill University
Jeffrey Moser	Assistant Professor	Social Sciences	McGill University
Jenny Bunnan	Associate Professor	Social Sciences	McGill University
Jill Baumgartner	Assistant Professor	Medicine/Public Health	McGill University
Jocelyne Feine	Professor	Medicine/Public Health	McGill University
Jon Sakata	Assistant Professor	Natural Science	McGill University
Jonathan Kimmelman	Associate Professor	Medicine/Public Health	McGill University
Jonathan Sterne	Professor	Social Sciences	McGill University
Judith Szapor	Assistant Professor	Social Sciences	McGill University
Jui Ramaprasad	Assistant Professor	Business	McGill University
Julie Cumming	Other	Arts and Humanities	McGill University
Kaber Dasgupta	Associate Professor	Medicine/Public Health	McGill University
Katherine Zien	Assistant Professor	Arts and Humanities	McGill University
Ken Hastings	Professor	Medicine/Public Health	McGill University
Kevin Manaugh	Assistant Professor	Natural Science/Earth and Atmospheric Science	McGill University
Kevin Schwartzman	Professor	Medicine/Public Health	McGill University
Kristen Anker	Assistant Professor	Law	McGill University
Kristin Norget	Associate Professor	Social Sciences	McGill University
Liane Alitowski	Instructor or Lecturer	Social Sciences	McGill University
Lisa Barg	Associate Professor	Arts and Humanities	McGill University
Louigi Addario-Beny	Associate Professor	Engineering	McGill University
Louis Chauvin	Instructor or Lecturer	Business	McGill University
Lynn Kozak	Assistant Professor	Arts and Humanities	McGill University
Lynn Mclauchlin	Assistant Professor	Medicine/Public Health	McGill University
Madhav Badami	Associate Professor	Social Sciences	McGill University
Maggie Kilgour	Professor	Arts and Humanities	McGill University
Mallika Banerjee	Assistant Professor	Business	McGill University
Margaret Graham	Associate Professor	Business	McGill University
Margaret Lock	Professor Emeritus	Medicine/Public Health	McGill University
Maria Theresia Starzmann	Assistant Professor	Social Sciences	McGill University
Marina Klein	Professor	Medicine/Public Health	McGill University
Mark S. Goldberg	Professor	Medicine/Public Health	McGill University
Matissa Hollister	Assistant Professor	Business	McGill University
Melania Cristescu	Associate Professor	Natural Science	McGill University
Michael Cowan	Associate Professor	Arts and Humanities	McGill University
Michael Hendricks	Assistant Professor	Natural Science	McGill University
Mindy Carter	Assistant Professor	Education	McGill University
Myron Frankman	Associate Professor	Economics	McGill University
Nancy Adler	Professor	Business	McGill University
Nancy Mayo	Professor	Medicine/Public Health	McGill University
Naomi Nichols	Assistant Professor	Education	McGill University
Narendra Subramanian	Associate Professor	Social Sciences	McGill University
Natalie Stoljar	Associate Professor	Arts and Humanities	McGill University
Ned Schantz	Associate Professor	Arts and Humanities	McGill University
Nicholas Dew	Associate Professor	Social Sciences	McGill University
Nicolas Kosoy	Assistant Professor	Economics	McGill University
Nil Basu	Associate Professor	Natural Science	McGill University
Ozlem Orhan	Instructor or Lecturer	Social Sciences	McGill University
Pascal Brissette	Professor	Arts and Humanities	McGill University
Pasha M. Khan	Assistant Professor	Social Sciences	McGill University
Patricia Hewlin	Assistant Professor	Business	McGill University
Paul Peters	Professor	Social Sciences	McGill University
Peter Brown	Professor	Natural Science/Earth and Atmospheric Science	McGill University
Peter Caines	Professor	Engineering	McGill University
Prashant Keshavmurthy	Assistant Professor	Social Sciences	McGill University
Prisca Fenoglio	Instructor or Lecturer	Arts and Humanities	McGill University
Raja Sengupta	Associate Professor	Natural Science/Earth and Atmospheric Science	McGill University
Rex Brynen	Professor	Social Sciences	McGill University
Reza Sharif Naeini	Assistant Professor	Medicine/Public Health	McGill University
Richard Janda	Associate Professor	Law	McGill University
Ronald Chase	Professor Emeritus	Natural Science	McGill University
Rowan Barrett	Assistant Professor	Natural Science	McGill University
Rudiger Krahe	Associate Professor	Natural Science	McGill University
Saku Mantere	Associate Professor	Business	McGill University
Sandeep Banerjee	Assistant Professor	Arts and Humanities	McGill University
Sandra Hyde	Associate Professor	Social Sciences	McGill University
Sasha Bematsky	Associate Professor	Medicine/Public Health	McGill University
Satyanarayan Dev	Adjunct Faculty	Engineering	McGill University
Setrag Manoukian	Associate Professor	Social Sciences	McGill University
Shaun Lovejoy	Professor	Natural Science	McGill University
Stephanie Posthumus	Assistant Professor	Arts and Humanities	McGill University
Stephen McAdams	Professor	Arts and Humanities	McGill University
Steven Jordan	Other	Education	McGill University
Subho Basu	Associate Professor	Social Sciences	McGill University
Sylvie de Blois	Associate Professor	Natural Science	McGill University
Tami Pereg-Bamea	Assistant Professor	Natural Science	McGill University
Thomas Lamarre	Professor	Social Sciences	McGill University
Tove Holmes	Assistant Professor	Social Sciences	McGill University
Uli Locher	Associate Professor	Social Sciences	McGill University
Wayne Wood	Instructor or Lecturer	Medicine/Public Health	McGill University
Yuriko Furuhata	Associate Professor	Social Sciences	McGill University
Brett Millier	Professor	Social Sciences	Middlebury
Carolyn Craven	Assistant Professor	Social Sciences	Middlebury
Chris McGrory Klyza	Professor	Social Sciences	Middlebury
Christopher Shaw	Instructor or Lecturer	Arts and Humanities	Middlebury
Helen Young	Professor	Natural Science	Middlebury
Jay Parini	Professor	Arts and Humanities	Middlebury
John Elder	Professor Emeritus	Arts and Humanities	Middlebury
Jonathan Isham Jr	Professor	Business	Middlebury
Merrill "Mez" Baker-Medard	Assistant Professor	Natural Science/Earth and Atmospheric Science	Middlebury
Michelle McCauley	Professor	Social Sciences	Middlebury
Molly Costanza Robinson	Associate Professor	Natural Science/Earth and Atmospheric Science	Middlebury
Peter Hans Matthews	Professor	Social Sciences	Middlebury
Richard Wolfson	Professor	Natural Science	Middlebury
Agustin Rayo	Professor	Social Sciences	MIT
Andreas Schramm	Professor	Engineering	MIT
Angelika Amon	Professor	Medicine/Public Health	MIT
Aram Harrow	Assistant Professor	Natural Science	MIT
Arne Hessenbruch	Instructor or Lecturer	Engineering	MIT
Bjorn Poonen	Professor	Engineering	MIT
Brad Skow	Associate Professor	Social Sciences	MIT
Bruno Coppi, O.M.R.I.	Professor Emeritus	Natural Science	MIT
Ceasar McDowell	Professor	Social Sciences	MIT
Charles F. Harvey	Professor	Engineering	MIT
Christine Kelly	Instructor or Lecturer	Business	MIT
Colette L. Heald	Associate Professor	Engineering	MIT
Daniel Cziczo	Professor	Engineering	MIT
Daniel Kleppner	Professor Emeritus	Natural Science	MIT	National Academy of Sciences
Danny Fox	Professor	Social Sciences	MIT
Dara Entekhabi	Professor	Engineering	MIT
David Gordon Wilson	Professor Emeritus	Engineering	MIT
David McGee	Assistant Professor	Natural Science/Earth and Atmospheric Science	MIT
David Pesetsky	Professor	Social Sciences	MIT
David R. Keith	Assistant Professor	Business	MIT
Deborah Ancona	Professor	Business	MIT
Dennis Mclaughlin	Professor	Engineering	MIT
Donca Stariade	Professor	Social Sciences	MIT
Elfatih A. B. Eltahir	Professor	Engineering	MIT
Eric Aim	Associate Professor	Engineering	MIT
Eric Goldberg	Associate Professor	Social Sciences	MIT
Erica Caple James	Associate Professor	Social Sciences	MIT
Frank Ackerman	Instructor or Lecturer	Social Sciences	MIT
Frederick P. Salvucci	Instructor or Lecturer	Engineering	MIT
Haynes Miller	Professor	Engineering	MIT
Heather Paxson	Professor	Social Sciences	MIT
Hilke Schlichting	Assistant Professor	Natural Science/Earth and Atmospheric Science	MIT
Ian Condry	Professor	Social Sciences	MIT
James B. Orlin	Professor	Business	MIT
Jane Abbott Connor	Instructor or Lecturer	Social Sciences	MIT
Jason Jay	Instructor or Lecturer	Business	MIT
Jeffrey S. Ravel	Professor	Social Sciences	MIT
Jennifer Craig	Instructor or Lecturer	Social Sciences	MIT
Jing Wang	Professor	Social Sciences	MIT
JoAnne Yates	Professor	Business	MIT
John S. Carroll	Professor	Business	MIT
John Sterman	Professor	Business	MIT
John Van Maanen	Professor	Business	MIT
Jolyon Bloomfield	Instructor or Lecturer	Natural Science	MIT
Jonathan Alan King	Professor	Natural Science	MIT
Judith A. Layzar	Professor	Social Sciences	MIT
Judith Jarvis Thomson	Professor Emeritus	Social Sciences	MIT
Junot Diaz	Professor	Social Sciences	MIT
Karen Boiko	Instructor or Lecturer	Social Sciences	MIT
Kieran Setiya	Professor	Social Sciences	MIT
Lee David Perlman	Instructor or Lecturer	Arts and Humanities	MIT
Leona D. Samson	Research Scientist, Reseach Professor or Scholar	Engineering	MIT
Leslie Norford	Professor	Engineering	MIT
Louis Bucciarelli	Professor Emeritus	Engineering	MIT
MarahGubar	Associate Professor	Arts and Humanities	MIT
Margarita Ribas Groeger	Instructor or Lecturer	Social Sciences	MIT
Martin Polz	Professor	Engineering	MIT
Michael Kenstowicz	Professor	Social Sciences	MIT
MichaelS.Scott Morton	Professor	Business	MIT
Michel Degraff	Professor	Social Sciences	MIT
Nick Montfort	Associate Professor	Social Sciences	MIT
Noam Chomsky	Professor Emeritus	Arts and Humanities	MIT
Norvin Richards	Professor	Social Sciences	MIT
Ozalp Ozar	Professor	Business	MIT
Pablo Jarillo-Herrero	Associate Professor	Natural Science	MIT
Renee Richardson Gosline	Assistant Professor	Business	MIT
Robart G. Eccles	Instructor or Lecturer	Business	MIT
Robert M. Freund	Professor	Business	MIT
Robert Nachtriab	Instructor or Lecturer	Business	MIT
Robert Stalnaker	Professor	Arts and Humanities	MIT
Roberto Fernandez	Professor	Business	MIT
Roger White	Associate Professor	Social Sciences	MIT
Sabine Levet	Instructor or Lecturer	Social Sciences	MIT
Sally Haslanger	Professor	Social Sciences	MIT
Sasha Costanza-Chock	Associate Professor	Social Sciences	MIT
Scott Aaronson	Associate Professor	Engineering	MIT
Stefan Helmreich	Professor	Social Sciences	MIT
Stephen Yablo	Professor	Social Sciences	MIT
Susan Ruff	Instructor or Lecturer	Social Sciences	MIT
T. L. Taylor	Associate Professor	Social Sciences	MIT
Takako Alkawa	Instructor or Lecturer	Social Sciences	MIT
Timothy G. Gutowski	Professor	Engineering	MIT
Vann McGee	Professor	Social Sciences	MIT
Amy Barber	Instructor or Lecturer	Arts and Humanities	Northeastern
Belinda Walzer	Assistant Professor	Arts and Humanities	Northeastern
Brian Helmuth	Professor	Natural Science	Northeastern
Brook Baker	Professor	Law	Northeastern
Brooke Foucault Welles	Assistant Professor	Arts and Humanities	Northeastern
Chris Doty	Instructor or Lecturer	Arts and Humanities	Northeastern
Christopher Bosso	Professor	Social Sciences	Northeastern
Christopher Chambers	Assistant Professor	Social Sciences	Northeastern
Clark Freifeld	Instructor or Lecturer	Engineering	Northeastern
Craig Robertson	Associate Professor	Arts and Humanities	Northeastern
Dana Brooks	Professor	Engineering	Northeastern
Daniel Aldrich	Professor	Social Sciences	Northeastern
Daniel Faber	Professor	Social Sciences	Northeastern
Daniel Hudon	Instructor or Lecturer	Natural Science	Northeastern
Daniel Noemi Voionmaa	Associate Professor	Social Sciences	Northeastern
Dennis Cokely	Professor	Arts and Humanities	Northeastern
Don Heiman	Professor	Natural Science	Northeastern
Emily Avery-Miller	Assistant Professor	Arts and Humanities	Northeastern
Emily Fox-Kales	Instructor or Lecturer	Social Sciences	Northeastern
Erika Koss	Instructor or Lecturer	Arts and Humanities	Northeastern
Gary Goshgarian	Professor	Arts and Humanities	Northeastern
Gillian Smith	Assistant Professor	Arts and Humanities	Northeastern
Gina Maiellaro	Professor	Arts and Humanities	Northeastern
Greg Hopwood	Adjunct Faculty	Arts and Humanities	Northeastern
Holbrook Robinson	Associate Professor	Arts and Humanities	Northeastern
Ilham Khuri-Makdisi	Associate Professor	Arts and Humanities	Northeastern
Inez Hedges	Professor Emeritus	Arts and Humanities	Northeastern
Jackie Barnes	Research Scientist, Reseach Professor or Scholar	Arts and Humanities	Northeastern
Jade Zee	Assistant Professor	Natural Science	Northeastern
Janet Randall	Professor	Arts and Humanities	Northeastern
Janet Bobcean	Associate Professor	Arts and Humanities	Northeastern
Jaydeep Bardhan	Assistant Professor	Engineering	Northeastern
Jeffrey Juris	Associate Professor	Arts and Humanities	Northeastern
Jennie Stephens	Professor	Social Sciences	Northeastern
Joan Fitzgerald	Professor	Social Sciences	Northeastern
Jose Buscaglia	Professor	Social Sciences	Northeastern
Jude Mathews	Assistant Professor	Natural Science	Northeastern
Karl Klare	Professor	Law	Northeastern
Kostia Bergman	Associate Professor	Natural Science	Northeastern
Lucy Williams	Professor	Law	Northeastern
Lynn Currier	Adjunct Faculty	Arts and Humanities	Northeastern
Mai’a Cross	Associate Professor	Social Sciences	Northeastern
Marian Leslie	Associate Professor	Arts and Humanities	Northeastern
Mark Patterson	Professor	Engineering	Northeastern
Mary Annas	Instructor or Lecturer	Arts and Humanities	Northeastern
Mary Jo Ondrechen	Professor	Natural Science	Northeastern
Matthias Ruth	Professor	Social Sciences	Northeastern
Melissa Wolter-Gustafson	Instructor or Lecturer	Arts and Humanities	Northeastern
Meryl Alper	Assistant Professor	Arts and Humanities	Northeastern
Michael Tolley	Associate Professor	Social Sciences	Northeastern
Miriam Leeser	Professor	Engineering	Northeastern
Moya Bailey	Professor	Social Sciences	Northeastern
Nicol McGruer	Professor	Engineering	Northeastern
Nicole Aljoe	Associate Professor	Arts and Humanities	Northeastern
Noah Paessel	Instructor or Lecturer	Arts and Humanities	Northeastern
Penelope Taylor	Instructor or Lecturer	Arts and Humanities	Northeastern
Peter Sessa	Other	Law	Northeastern
Phil Brown	Professor	Social Sciences	Northeastern
Prisca Castanyer	Instructor or Lecturer	Economics	Northeastern
Rafael Ubal	Assistant Professor	Engineering	Northeastern
Rory Smead	Associate Professor	Arts and Humanities	Northeastern
Sarah Finn	Assistant Professor	Arts and Humanities	Northeastern
Sarah Jackson	Assistant Professor	Arts and Humanities	Northeastern
Sarah Kanouse	Associate Professor	Arts and Humanities	Northeastern
Serena Parekh	Associate Professor	Arts and Humanities	Northeastern
Seth Mulliken	Assistant Professor	Arts and Humanities	Northeastern
Sharon Harlan	Professor	Medicine/Public Health	Northeastern
Somy Kim	Professor	Arts and Humanities	Northeastern
Stefano Basagni	Associate Professor	Engineering	Northeastern
Stephen Nathanson	Professor Emeritus	Arts and Humanities	Northeastern
Steven Vallas	Professor	Social Sciences	Northeastern
Stuart Peterfreund	Professor	Arts and Humanities	Northeastern
Susan Ventura	Associate Professor	Medicine/Public Health	Northeastern
Suzanna Walters	Professor	Social Sciences	Northeastern
Thomas Starr	Professor	Arts and Humanities	Northeastern
Val Moghadam	Professor	Social Sciences	Northeastern
Vaso Lykourinou	Assistant Professor	Natural Science	Northeastern
Whitney Kelting	Associate Professor	Arts and Humanities	Northeastern
Williams Dickens	Professor	Economics	Northeastern
A.B. Huber	Assistant Professor	Arts and Humanities	NYU
Adam Becker	Associate Professor	Arts and Humanities	NYU
Afrodesia McCannon	Professor	Arts and Humanities	NYU
Aleksandar Donev	Assistant Professor	Engineering	NYU
Alexander Galloway	Professor	Social Sciences	NYU
Ali Mirsepassi	Professor	Social Sciences	NYU
Amir Minsky	Assistant Professor	Social Sciences	NYU
Amy Bentley	Associate Professor	Medicine/Public Health	NYU
Andrea Gadberry	Assistant Professor	Arts and Humanities	NYU
Andrew Needham	Associate Professor	Arts and Humanities	NYU
Andrew Ross	Professor	Social Sciences	NYU
Andrzej Ancygier	Instructor or Lecturer	Natural Science/Earth and Atmospheric Science	NYU
Angela Zito	Associate Professor	Social Sciences	NYU
Anne DeWitt	Assistant Professor	Arts and Humanities	NYU
Anne Rademacher	Associate Professor	Natural Science/Earth and Atmospheric Science	NYU
Arjun Appadurai	Professor	Social Sciences	NYU
Arthur Caplan	Other	Medicine/Public Health	NYU
Arvind Rajagopal	Professor	Social Sciences	NYU
Barbara Edelstein-Zhang	Assistant Professor	Arts and Humanities	NYU
Barbara O'Hara	Instructor or Lecturer	Arts and Humanities	NYU
Barry Rugg	Associate Professor	Natural Science	NYU
Beatrice Longuenesse	Professor	Arts and Humanities	NYU
Bertell Ollman	Professor	Social Sciences	NYU
Bonnie C. Brennan	Adjunct Faculty	Arts and Humanities	NYU
Brendan Hogan	Associate Professor	Arts and Humanities	NYU
Brett Gary	Associate Professor	Social Sciences	NYU
Bryce Rudyk	Adjunct Faculty	Arts and Humanities	NYU
Caitlin Zaloom	Associate Professor	Social Sciences	NYU
Carlos de Jesus	Associate Professor	Arts and Humanities	NYU
Carol Rial	Adjunct Faculty	Arts and Humanities	NYU
Carolyn Dimitri	Associate Professor	Medicine/Public Health	NYU
Cecil MacKinnon	Professor	Arts and Humanities	NYU
Chat Gunter	Associate Professor	Law	NYU
Chinnie Ding	Assistant Professor	Arts and Humanities	NYU
Christian Parenti	Professor	Arts and Humanities	NYU
Christine Cboy	Professor	Arts and Humanities	NYU
Christine Trotter	Assistant Professor	Social Sciences	NYU
Christopher Bram	Adjunct Faculty	Arts and Humanities	NYU
Christopher Schlottman	Associate Professor	Social Sciences	NYU
Colette Mazzucelli	Professor	Social Sciences	NYU
Cristina Beltran	Associate Professor	Social Sciences	NYU
Dale Jamieson	Professor	Natural Science/Earth and Atmospheric Science	NYU
Dalton Conley	Professor	Social Sciences	NYU
Dan Fagin	Associate Professor	Social Sciences	NYU
Daniel Walkowitz	Professor	Social Sciences	NYU
Daniel Zwanziger	Professor	Natural Science	NYU
David Bagnall	Adjunct Faculty	Arts and Humanities	NYU
David Kanter	Assistant Professor	Natural Science/Earth and Atmospheric Science	NYU
David Thornton Moore	Associate Professor	Arts and Humanities	NYU
Dean Saranillio	Assistant Professor	Social Sciences	NYU
Dennis Geronimus	Associate Professor	Social Sciences	NYU
Elayne Tobin	Assistant Professor	Arts and Humanities	NYU
Elizabeth Bradley	Professor	Arts and Humanities	NYU
Ellen Tuchman	Associate Professor	Social Sciences	NYU
Emily Apter	Professor	Social Sciences	NYU
Emily Bauman	Assistant Professor	Arts and Humanities	NYU
Emily Martin	Professor	Social Sciences	NYU
Eric Klinenberg	Professor	Social Sciences	NYU
Eric Sanderson	Adjunct Faculty	Natural Science/Earth and Atmospheric Science	NYU
Eve Meltzer	Associate Professor	Arts and Humanities	NYU
Farai Chideya	Other	Arts and Humanities	NYU
Farzad Mahootian	Associate Professor	Arts and Humanities	NYU
Finn Brunton	Assistant Professor	Social Sciences	NYU
Fred Myers	Professor	Social Sciences	NYU
Gary Shimokawa	Professor	Arts and Humanities	NYU
Gayatri Gopinath	Associate Professor	Social Sciences	NYU
Gene Cittadino	Associate Professor	Arts and Humanities	NYU
Gianpaolo Baiocchi	Associate Professor	Arts and Humanities	NYU
Greg Vargo	Assistant Professor	Arts and Humanities	NYU
Hallie Franks	Assistant Professor	Arts and Humanities	NYU
Hannah Gurman	Associate Professor	Arts and Humanities	NYU
Harvey Molotch	Professor	Social Sciences	NYU
Hasia Diner	Professor	Social Sciences	NYU
Heidi White	Professor	Arts and Humanities	NYU
Iddo Tavory	Assistant Professor	Social Sciences	NYU
Isra Ali	Assistant Professor	Arts and Humanities	NYU
J. David Brimmer	Instructor or Lecturer	Arts and Humanities	NYU
James Tolisano	Adjunct Faculty	Natural Science/Earth and Atmospheric Science	NYU
Jamie Skye Bianco	Assistant Professor	Social Sciences	NYU
Jane B. Malmo	Instructor or Lecturer	Arts and Humanities	NYU
Jeane Anastas	Professor	Social Sciences	NYU
Jeff Goodwin	Professor	Social Sciences	NYU
Jeffrey Erlich	Assistant Professor	Medicine/Public Health	NYU
Jeffrey Spear	Associate Professor	Arts and Humanities	NYU
Jennifer Jacquet	Assistant Professor	Natural Science/Earth and Atmospheric Science	NYU
Jennifer Zoble	Assistant Professor	Arts and Humanities	NYU
Jesse Bransford	Associate Professor	Arts and Humanities	NYU
Jessica Green	Assistant Professor	Natural Science/Earth and Atmospheric Science	NYU
Jessie Austrian	Adjunct Faculty	Arts and Humanities	NYU
Jim Uleman	Professor	Social Sciences	NYU
Jini Kim Watson	Associate Professor	Arts and Humanities	NYU
John Archer	Professor	Arts and Humanities	NYU
John Fousek	Associate Professor	Social Sciences	NYU
John Halpin	Professor	Natural Science	NYU
John Kuo Wei Tchen	Other	Social Sciences	NYU
John Zindar	Adjunct Faculty	Social Sciences	NYU
Jon Ritter	Associate Professor	Social Sciences	NYU
Jonathan Bain	Associate Professor	Social Sciences	NYU
Jonathan Scott	Adjunct Faculty	Arts and Humanities	NYU
Jonathan Soffer	Professor	Social Sciences	NYU
Joseph Imhauser	Adjunct Faculty	Arts and Humanities	NYU
Julia Jarcho	Assistant Professor	Arts and Humanities	NYU
Julian Everett Allgood	Other	Arts and Humanities	NYU
Julie Sloane	Instructor or Lecturer	Arts and Humanities	NYU
Juliet Fleming	Associate Professor	Arts and Humanities	NYU
June Foley	Other	Arts and Humanities	NYU
Justin Stearns	Associate Professor	Social Sciences	NYU
Karen Holmberg	Other	Social Sciences	NYU
Katherine Hurbis-Cberrier	Associate Professor	Arts and Humanities	NYU
Kathleen Gerson	Professor	Social Sciences	NYU
Kathryn A. Smith	Professor	Social Sciences	NYU
KC Trommer	Other	Arts and Humanities	NYU
Kendall Smith	Associate Professor	Engineering	NYU
Kevin Bonney	Assistant Professor	Arts and Humanities	NYU
Kim Phillips-Fein	Associate Professor	Social Sciences	NYU
Kimberly DaCosta	Associate Professor	Arts and Humanities	NYU
Kristin Horton	Associate Professor	Arts and Humanities	NYU
Kwami Coleman	Assistant Professor	Arts and Humanities	NYU
Kyle Wanberg	Assistant Professor	Arts and Humanities	NYU
Laszlo Santha	Instructor or Lecturer	Arts and Humanities	NYU
Laura Slatkin	Professor	Arts and Humanities	NYU
Lauren Fritz	Adjunct Faculty	Arts and Humanities	NYU
Lily Chumley	Assistant Professor	Social Sciences	NYU
Lindsay Davies	Associate Professor	Arts and Humanities	NYU
Lisa DiCaprio	Associate Professor	Arts and Humanities	NYU
Lisa Duggan	Professor	Social Sciences	NYU
Louise Harpman	Associate Professor	Engineering	NYU
Luis Francia	Adjunct Faculty	Social Sciences	NYU
Mara Mills	Assistant Professor	Social Sciences	NYU
Marie Cruz Soto	Assistant Professor	Arts and Humanities	NYU
Marita Sturken	Professor	Social Sciences	NYU
Mark Crispin Miller	Professor	Social Sciences	NYU
Mark Galeotti	Professor	Social Sciences	NYU
Mark Read	Professor	Arts and Humanities	NYU
Marsha McKeever	Instructor or Lecturer	Arts and Humanities	NYU
Mary Helen Kolisnyk	Adjunct Faculty	Arts and Humanities	NYU
Mary Leou	Associate Professor	Natural Science/Earth and Atmospheric Science	NYU
Mary Louise Pratt	Professor Emeritus	Social Sciences	NYU
Matthew Christe Dlilen	Adjunct Faculty	Arts and Humanities	NYU
Maureen McLane	Professor	Arts and Humanities	NYU
Mechtild Schmidt Feist	Associate Professor	Social Sciences	NYU
Michael Balter	Adjunct Faculty	Arts and Humanities	NYU
Michael Gould-Wartofsky	Adjunct Faculty	Social Sciences	NYU
Michael S. Landy	Professor	Social Sciences	NYU
Michael Shank	Adjunct Faculty	Social Sciences	NYU
Michael Shenefelt	Professor	Arts and Humanities	NYU
Michael Westerman	Associate Professor	Social Sciences	NYU
Millery Polyne	Associate Professor	Arts and Humanities	NYU
Mitchell Joaehim	Associate Professor	Arts and Humanities	NYU
Molly Nolan	Professor	Social Sciences	NYU
Myisha Priest	Assistant Professor	Arts and Humanities	NYU
Nancy Barton	Associate Professor	Arts and Humanities	NYU
Nancy Leszczynski	Professor	Social Sciences	NYU
Natalie Jeremijenko	Associate Professor	Arts and Humanities	NYU
Nicholas Delon	Assistant Professor	Natural Science/Earth and Atmospheric Science	NYU
Nicholas Mirzoeft'	Professor	Social Sciences	NYU
Nicholas Tanis	Associate Professor	Arts and Humanities	NYU
Nicholas Wolf	Assistant Professor	Social Sciences	NYU
Nicole Starosielski	Assistant Professor	Social Sciences	NYU
Nina Cornyetz	Associate Professor	Arts and Humanities	NYU
Nina d'Alessandro	Assistant Professor	Arts and Humanities	NYU
Nina Katchadourian	Associate Professor	Arts and Humanities	NYU
Pascal Menoret	Assistant Professor	Social Sciences	NYU
Patrick Deer	Associate Professor	Arts and Humanities	NYU
Patrick Sharkey	Associate Professor	Social Sciences	NYU
Paul Owen	Associate Professor	Arts and Humanities	NYU
Paula Chakravartty	Associate Professor	Social Sciences	NYU
Peder Anker	Associate Professor	Natural Science/Earth and Atmospheric Science	NYU
Peter Nicholas	Professor	Arts and Humanities	NYU
Pierre Depaz	Adjunct Faculty	Arts and Humanities	NYU
Priscilla Karant	Assistant Professor	Arts and Humanities	NYU
Rahul Hamid	Other	Arts and Humanities	NYU
Rebecca Amato	Adjunct Faculty	Arts and Humanities	NYU
Richard Halpern	Professor	Arts and Humanities	NYU
Richard Kleeman	Professor	Engineering	NYU
Richard Sennett	Professor	Social Sciences	NYU
Ritty Lukose	Associate Professor	Arts and Humanities	NYU
Robert Mitchell	Adjunct Faculty	Arts and Humanities	NYU
Robert Vorlicky	Associate Professor	Arts and Humanities	NYU
Rosalind Fredericks	Assistant Professor	Arts and Humanities	NYU
Rosanne Kennedy	Assistant Professor	Arts and Humanities	NYU
Roxana Julia	Assistant Professor	Economics	NYU
Roy Radner	Professor	Business	NYU
Ryan Brown	Assistant Professor	Medicine/Public Health	NYU
Sally Guttmacher	Professor	Social Sciences	NYU
Scott Williams	Assistant Professor	Social Sciences	NYU
Sharon Friedman	Associate Professor	Arts and Humanities	NYU
Sinan Antoon	Associate Professor	Arts and Humanities	NYU
Sinclair Thomson	Associate Professor	Social Sciences	NYU
Sonali McDermid	Assistant Professor	Natural Science/Earth and Atmospheric Science	NYU
Srdja Popovic	Adjunct Faculty	Social Sciences	NYU
Stephen Duncombe	Associate Professor	Social Sciences	NYU
Steve Hutkins	Associate Professor	Arts and Humanities	NYU
Steven Lukes	Professor	Social Sciences	NYU
Stevin Azo Michels	Adjunct Faculty	Arts and Humanities	NYU
Sukhdev Sandhu	Associate Professor	Arts and Humanities	NYU
Sylvia Sichel	Adjunct Faculty	Arts and Humanities	NYU
Thuy Linh Tu	Associate Professor	Social Sciences	NYU
Timothy J. Reiss	Professor Emeritus	Social Sciences	NYU
Todd Disotell	Professor	Social Sciences	NYU
Tom Looser	Associate Professor	Social Sciences	NYU
Tyler Volk	Professor	Natural Science/Earth and Atmospheric Science	NYU
Una Chaudhuri	Professor	Arts and Humanities	NYU
Valerie Forman	Associate Professor	Arts and Humanities	NYU
Vasuki Nesiah	Associate Professor	Arts and Humanities	NYU
Wei Ji Ma	Associate Professor	Social Sciences	NYU
William F. Hewitt	Adjunct Faculty	Social Sciences	NYU
William R. Caspary	Adjunct Faculty	Social Sciences	NYU
William Ruddick	Professor Emeritus	Arts and Humanities	NYU
Yemane Demissie	Associate Professor	Arts and Humanities	NYU
	Assistant Professor	Social Sciences	NYU
Aaron Liston	Professor	Natural Science	Oregon State University
Aaron Wolf	Professor	Natural Science/Earth and Atmospheric Science	Oregon State University
Alan Mix	Professor	Natural Science/Earth and Atmospheric Science	Oregon State University
Allen Thompson	Associate Professor	Arts and Humanities	Oregon State University
Anders Carlson	Associate Professor	Natural Science/Earth and Atmospheric Science	Oregon State University
Andreas Schmittner	Associate Professor	Natural Science/Earth and Atmospheric Science	Oregon State University
Anne Nolin	Professor	Natural Science/Earth and Atmospheric Science	Oregon State University
Aurora Sherman	Associate Professor	Arts and Humanities	Oregon State University
Barbara Muraca	Assistant Professor	Natural Science	Oregon State University
Ben Phalan	Research Scientist, Reseach Professor or Scholar	Natural Science	Oregon State University
Beverly Law	Professor	Natural Science/Earth and Atmospheric Science	Oregon State University
Bill Ripple	Professor	Natural Science/Earth and Atmospheric Science	Oregon State University
Blaine (Tony) Vogt	Adjunct Faculty	Arts and Humanities	Oregon State University
Bradley Boovy	Assistant Professor	Arts and Humanities	Oregon State University
Brian Haley	Associate Professor	Natural Science/Earth and Atmospheric Science	Oregon State University
Bryan Tilt	Associate Professor	Arts and Humanities	Oregon State University
Carrie Berger	Instructor or Lecturer	Natural Science	Oregon State University
Charlie Miller	Professor Emeritus	Natural Science/Earth and Atmospheric Science	Oregon State University
Chris Still	Associate Professor	Natural Science/Earth and Atmospheric Science	Oregon State University
Christo Buizert	Assistant Professor	Natural Science/Earth and Atmospheric Science	Oregon State University
Christopher Bayne	Professor Emeritus	Natural Science	Oregon State University
Daniel Roby	Professor	Natural Science	Oregon State University
Darrell W. Ross	Professor	Natural Science/Earth and Atmospheric Science	Oregon State University
David Perry	Professor Emeritus	Natural Science/Earth and Atmospheric Science	Oregon State University
Dominique Bachelet	Associate Professor	Natural Science	Oregon State University
Dwaine Plaza	Professor	Arts and Humanities	Oregon State University
Elizabeth Kelly	Instructor or Lecturer	Natural Science	Oregon State University
George Waldbusser	Assistant Professor	Natural Science/Earth and Atmospheric Science	Oregon State University
Glencora Borradaile	Associate Professor	Engineering	Oregon State University
J. Boone Kauffman	Research Scientist, Reseach Professor or Scholar	Natural Science	Oregon State University
Jacob Hamblin	Professor	Arts and Humanities	Oregon State University
Jana Bouwma-Gearhart	Associate Professor	Education	Oregon State University
Jennifer Hutchings	Assistant Professor	Natural Science/Earth and Atmospheric Science	Oregon State University
Jim Trappe	Professor	Natural Science/Earth and Atmospheric Science	Oregon State University
Joanne Tynon	Associate Professor	Natural Science/Earth and Atmospheric Science	Oregon State University
Joe Stoner	Associate Professor	Natural Science/Earth and Atmospheric Science	Oregon State University
John Selker	Professor	Natural Science	Oregon State University
John Simonsen	Professor	Natural Science/Earth and Atmospheric Science	Oregon State University
Jonathan Kaplan	Professor	Arts and Humanities	Oregon State University
Jonathan Katz	Professor	Arts and Humanities	Oregon State University
Joseph Krause	Professor	Arts and Humanities	Oregon State University
Joseph Orosco	Associate Professor	Arts and Humanities	Oregon State University
Karen Higgins	Professor Emeritus	Education	Oregon State University
Karen Shell	Associate Professor	Natural Science/Earth and Atmospheric Science	Oregon State University
Karen Thompson	Assistant Professor	Education	Oregon State University
Kathleen Dean Moore	Professor	Arts and Humanities	Oregon State University
Keith Olsen	Research Scientist, Reseach Professor or Scholar	Natural Science/Earth and Atmospheric Science	Oregon State University
Ken Winograd	Associate Professor	Education	Oregon State University
Kim Bernard	Assistant Professor	Natural Science/Earth and Atmospheric Science	Oregon State University
Klaus Puettmann	Professor	Natural Science/Earth and Atmospheric Science	Oregon State University
Leigh Torres	Assistant Professor	Natural Science	Oregon State University
Marisa Chappell	Associate Professor	Arts and Humanities	Oregon State University
Mark Harmon	Professor	Natural Science/Earth and Atmospheric Science	Oregon State University
Mark Schulze	Assistant Professor	Natural Science/Earth and Atmospheric Science	Oregon State University
Matt Jones	Research Scientist, Reseach Professor or Scholar	Natural Science/Earth and Atmospheric Science	Oregon State University
Matthew Betts	Associate Professor	Natural Science/Earth and Atmospheric Science	Oregon State University
Michael Blouin	Professor	Natural Science	Oregon State University
Michael Paul Nelson	Professor	Natural Science/Earth and Atmospheric Science	Oregon State University
Mike O'Malley	Instructor or Lecturer	Education	Oregon State University
Molly Engle	Professor	Education	Oregon State University
Nana Osei-Kofi	Associate Professor	Arts and Humanities	Oregon State University
Nancy Allen	Instructor or Lecturer	Natural Science	Oregon State University
Nancy Rosenberger	Professor	Arts and Humanities	Oregon State University
Peter Clark	Professor	Natural Science/Earth and Atmospheric Science	Oregon State University
Phillip Sollins	Professor Emeritus	Natural Science/Earth and Atmospheric Science	Oregon State University
Richard Clinton	Professor Emeritus	Arts and Humanities	Oregon State University
Robert Tanguay	Professor	Natural Science/Earth and Atmospheric Science	Oregon State University
Ronald Reuter	Associate Professor	Natural Science/Earth and Atmospheric Science	Oregon State University
Sandy Riverman	Instructor or Lecturer	Faculty -uncategorized	Oregon State University
Sharyn Clough	Professor	Arts and Humanities	Oregon State University
Shawn Rowe	Associate Professor	Education	Oregon State University
Stephanie Jenkins	Assistant Professor	Arts and Humanities	Oregon State University
Steven Strauss	Professor	Natural Science/Earth and Atmospheric Science	Oregon State University
SueAnn Bottoms	Assistant Professor	Education	Oregon State University
Susie Dunham	Instructor or Lecturer	Natural Science	Oregon State University
Taal Levi	Assistant Professor	Natural Science	Oregon State University
Theo Dreher	Professor	Natural Science	Oregon State University
Thomas Hilker	Assistant Professor	Natural Science/Earth and Atmospheric Science	Oregon State University
Adair Dingle	Professor	Engineering	Seattle University
Alexander Mouton	Associate Professor	Arts and Humanities	Seattle University
Alexandra Adame	Assistant Professor	Social Sciences	Seattle University
Allison Henrich	Associate Professor	Engineering	Seattle University
Amelia Derr	Assistant Professor	Social Sciences	Seattle University
Amy Lastuka	Adjunct Faculty	Business	Seattle University
AmyL. Eva	Associate Professor	Education	Seattle University
Andy Demetre	Professor	Engineering	Seattle University
Angelique Davis	Associate Professor	Social Sciences	Seattle University
Anita Jablonski	Associate Professor	Medicine/Public Health	Seattle University
Anne Hirsch	Professor	Medicine/Public Health	Seattle University
April Atwood	Instructor or Lecturer	Business	Seattle University
Arun lyer	Instructor or Lecturer	Arts and Humanities	Seattle University
Audrey Hudgins	Instructor or Lecturer	Social Sciences	Seattle University
Ben Curtis	Assistant Professor	Social Sciences	Seattle University
Benjamin Howe	Instructor or Lecturer	Arts and Humanities	Seattle University
Benjamin Tribelhorn	Assistant Professor	Engineering	Seattle University
Bonnie Bowie	Associate Professor	Medicine/Public Health	Seattle University
Brenda Bourns	Instructor or Lecturer	Natural Science	Seattle University
Brett Kaiser	Assistant Professor	Natural Science	Seattle University
Brian Fischer	Assistant Professor	Engineering	Seattle University
Bridget Walker	Associate Professor	Education	Seattle University
C. Jay Lambe	Associate Professor	Business	Seattle University
Carl Obermiller	Professor	Business	Seattle University
Carmen Gonzalez	Professor	Law	Seattle University
Carolyn Stenback	Associate Professor	Natural Science	Seattle University
Catherine Punsalan-Manlimos	Associate Professor	Arts and Humanities	Seattle University
Charles Tung	Associate Professor	Arts and Humanities	Seattle University
Cheryl Wotus	Associate Professor	Natural Science	Seattle University
Christie Eppler	Associate Professor	Arts and Humanities	Seattle University
Christie Lynk	Adjunct Faculty	Arts and Humanities	Seattle University
Christina Roberts	Associate Professor	Arts and Humanities	Seattle University
Christopher Paul	Associate Professor	Social Sciences	Seattle University
Clair Le Beau	Assistant Professor	Social Sciences	Seattle University
Cynthia Moe-Lobeda	Professor	Arts and Humanities	Seattle University
Daniel Washburn	Instructor or Lecturer	Arts and Humanities	Seattle University
Daniele DeSantis	Instructor or Lecturer	Arts and Humanities	Seattle University
David Boness	Professor	Natural Science	Seattle University
David Neel	Associate Professor	Engineering	Seattle University
Dean Spade	Associate Professor	Law	Seattle University
Deborah Hutchinson	Adjunct Faculty	Natural Science	Seattle University
Dominic CodyKramers	Instructor or Lecturer	Arts and Humanities	Seattle University
Doug Latch	Associate Professor	Natural Science	Seattle University
Ekaterina Emm	Assistant Professor	Business	Seattle University
Elizabeth Sikes	Adjunct Faculty	Arts and Humanities	Seattle University
Emily Lieb	Assistant Professor	Arts and Humanities	Seattle University
Emily Rose Ernst	Associate Professor	Social Sciences	Seattle University
Eric Larson	Associate Professor	Engineering	Seattle University
Erik J. Olsen	Associate Professor	Social Sciences	Seattle University
Felipe Murtinho	Assistant Professor	Social Sciences	Seattle University
Frank Shih	Associate Professor	Engineering	Seattle University
Frederica Helmiere	Instructor or Lecturer	Social Sciences	Seattle University
Gabriella Gutierrez y Muhs	Professor	Social Sciences	Seattle University
Gareth Green	Associate Professor	Business	Seattle University
Geoffrey Grosshans	Instructor or Lecturer	Arts and Humanities	Seattle University
Georgia Gurrieri	Instructor or Lecturer	Arts and Humanities	Seattle University
Gordon Miller	Other	Natural Science/Earth and Atmospheric Science	Seattle University
Greg Magnan	Professor	Business	Seattle University
Greg Mason	Associate Professor	Engineering	Seattle University
Hannah Tracy	Instructor or Lecturer	Arts and Humanities	Seattle University
Harriet Stephenson	Professor Emeritus	Business	Seattle University
Heath Spencer	Instructor or Lecturer	Social Sciences	Seattle University
Heather Brown	Instructor or Lecturer	Natural Science	Seattle University
Henry W. McGee, Jr.	Professor	Law	Seattle University
Hilary Hawley	Instructor or Lecturer	Arts and Humanities	Seattle University
J.Wesley Lauer	Associate Professor	Engineering	Seattle University
Jacqueline Miller	Associate Professor	Social Sciences	Seattle University
Jason M. Wirth	Professor	Arts and Humanities	Seattle University
Jay Mclean-Riggs	Adjunct Faculty	Natural Science	Seattle University
Jean Jacoby	Professor	Engineering	Seattle University
Jeanette Rodriguez	Professor	Arts and Humanities	Seattle University
Jennifer Sorensen	Assistant Professor	Natural Science	Seattle University
Jerome Veith	Instructor or Lecturer	Arts and Humanities	Seattle University
Jessica Ludescher lmanaka	Associate Professor	Business	Seattle University
Jhon Paul Smith	Assistant Professor	Engineering	Seattle University
Jim Dunnigan	Adjunct Faculty	Education	Seattle University
Jodi O'Brien	Professor	Social Sciences	Seattle University
John McLean	Instructor or Lecturer	Business	Seattle University
Josephine Archibald	Instructor or Lecturer	Natural Science/Earth and Atmospheric Science	Seattle University
Karen Cowgill	Assistant Professor	Medicine/Public Health	Seattle University
Karla Mather	Instructor or Lecturer	Medicine/Public Health	Seattle University
Kate Koppelman	Associate Professor	Arts and Humanities	Seattle University
Katherine Camacho Carr	Professor	Medicine/Public Health	Seattle University
Katherine Raichle	Associate Professor	Social Sciences	Seattle University
Kathleen Pape	Adjunct Faculty	Social Sciences	Seattle University
Katie O'Neill	Adjunct Faculty	Engineering	Seattle University
Kenneth Allan	Associate Professor	Social Sciences	Seattle University
Ki Gottberg	Professor	Arts and Humanities	Seattle University
Kira Mauseth	Instructor or Lecturer	Social Sciences	Seattle University
Kristin Hultgren	Assistant Professor	Natural Science	Seattle University
Larry Cushnie	Instructor or Lecturer	Social Sciences	Seattle University
Leanne Robertson	Associate Professor	Engineering	Seattle University
Linda Frothinger	Instructor or Lecturer	Social Sciences	Seattle University
Lindsay Leeder	Instructor or Lecturer	Medicine/Public Health	Seattle University
Lindsay Whitlow	Associate Professor	Natural Science	Seattle University
Lisa Brodoff	Associate Professor	Law	Seattle University
Louisa Edgerly	Adjunct Faculty	Social Sciences	Seattle University
Madeline Kass	Professor	Law	Seattle University
Marc Mcleod	Associate Professor	Social Sciences	Seattle University
Margit E. McGuire	Professor	Education	Seattle University
Maria Bullen-Fernandez	Professor	Social Sciences	Seattle University
Maria Pettinato	Associate Professor	Medicine/Public Health	Seattle University
Mark Jordan	Assistant Professor	Natural Science	Seattle University
Mary Alberg	Professor	Natural Science	Seattle University
Mary K. Brennan	Professor	Social Sciences	Seattle University
Matthew Shields	Instructor or Lecturer	Engineering	Seattle University
Mclean Slaughter	Associate Professor	Engineering	Seattle University
Meenakshi Rishi	Associate Professor	Business	Seattle University
Michael D. Marsolek	Associate Professor	Engineering	Seattle University
Michael Ng	Adjunct Faculty	Social Sciences	Seattle University
Michael Zanis	Assistant Professor	Natural Science	Seattle University
Michelle Dubois	Associate Professor	Natural Science	Seattle University
Mimi Cheng	Instructor or Lecturer	Natural Science	Seattle University
Molly Clark Hilliard	Assistant Professor	Arts and Humanities	Seattle University
Nalini lyer	Professor	Arts and Humanities	Seattle University
Naomi Hume	Associate Professor	Social Sciences	Seattle University
Naomi Kasumi	Associate Professor	Social Sciences	Seattle University
Nathan Canney	Instructor or Lecturer	Engineering	Seattle University
Olha Krupa	Assistant Professor	Social Sciences	Seattle University
Pamela Prentice	Adjunct Faculty	Business	Seattle University
Pamela Taylor	Associate Professor	Education	Seattle University
Pat Buchsel	Instructor or Lecturer	Medicine/Public Health	Seattle University
Paulette Kidder	Associate Professor	Arts and Humanities	Seattle University
Phil Thompson	Professor	Engineering	Seattle University
Quan Le	Associate Professor	Business	Seattle University
Rachelle Meenach-Ligrano	Instructor or Lecturer	Medicine/Public Health	Seattle University
Randall Horton	Associate Professor	Social Sciences	Seattle University
Rebecca Hartley	Associate Professor	Natural Science	Seattle University
Richard Cunningham	Professor Emeritus	Arts and Humanities	Seattle University
Richard LeBlanc	Professor	Engineering	Seattle University
Rob Andolina	Associate Professor	Social Sciences	Seattle University
Rob Efird	Associate Professor	Social Sciences	Seattle University
Robert Aguirre	Instructor or Lecturer	Arts and Humanities	Seattle University
Robert Heeren	Professor Emeritus	Engineering	Seattle University
Robert Rutherford	Associate Professor	Natural Science	Seattle University
Ronald C. Sly	Professor	Law	Seattle University
Roshanak Roshandel	Associate Professor	Engineering	Seattle University
Ryan Mclaughlin	Associate Professor	Natural Science	Seattle University
Sally Mclaughlin	Instructor or Lecturer	Natural Science	Seattle University
Samantha Morefield	Adjunct Faculty	Natural Science	Seattle University
Sean McDowell	Associate Professor	Arts and Humanities	Seattle University
Serena Cosgrove	Assistant Professor	Arts and Humanities	Seattle University
Sharon Lobel	Professor	Business	Seattle University
Sharon Suh	Professor	Arts and Humanities	Seattle University
Sonora Jha	Associate Professor	Social Sciences	Seattle University
Stacey Jones	Instructor or Lecturer	Economics	Seattle University
Steen Halling	Professor Emeritus	Social Sciences	Seattle University
Sue Jackals	Professor	Natural Science	Seattle University
Tal Peretz	Assistant Professor	Social Sciences	Seattle University
Tanya M. Hayes	Associate Professor	Natural Science/Earth and Atmospheric Science	Seattle University
Tayyab Mahmud	Professor	Law	Seattle University
Terry Read	Instructor or Lecturer	Medicine/Public Health	Seattle University
Theresa Earenfight	Professor	Social Sciences	Seattle University
Therry Eparwa	Instructor or Lecturer	Medicine/Public Health	Seattle University
Tom Taylor	Professor	Social Sciences	Seattle University
Tracey Pepper	Instructor or Lecturer	Social Sciences	Seattle University
Trileigh Tucker	Associate Professor	Natural Science/Earth and Atmospheric Science	Seattle University
Valeria A. Lesniak	Associate Professor	Arts and Humanities	Seattle University
Victoria Kill	Adjunct Faculty	Arts and Humanities	Seattle University
Vinod Acharya	Instructor or Lecturer	Arts and Humanities	Seattle University
Wai-Shun Hung	Associate Professor	Arts and Humanities	Seattle University
Wes Howard-Brook	Instructor or Lecturer	Arts and Humanities	Seattle University
William Kangas	Instructor or Lecturer	Social Sciences	Seattle University
Yancy Hughes Dominick	Instructor or Lecturer	Arts and Humanities	Seattle University
Axel Brunger	Professor	Natural Science	Stanford University
John Rick	Associate Professor	Social Sciences	Stanford University
Russ B. Altman	Professor	Medicine/Public Health	Stanford University
A. P. Robertson	Instructor or Lecturer	Engineering	Stanford University
Aharon Kapitulnik	Professor	Natural Science	Stanford University
Aishwary Kumar	Assistant Professor	Arts and Humanities	Stanford University
Albert Camarillo	Professor	Arts and Humanities	Stanford University
Albert Gelpi	Professor Emeritus	Arts and Humanities	Stanford University
Albert Macovski	Professor Emeritus	Engineering	Stanford University
Alex Woloch	Associate Professor	Arts and Humanities	Stanford University
Alexandria Boehm	Associate Professor	Engineering	Stanford University
Ali Yaycioglu	Assistant Professor	Arts and Humanities	Stanford University
Alison Marantz	Professor	Law	Stanford University
Alison McQueen	Assistant Professor	Social Sciences	Stanford University
Allen Wood	Professor Emeritus	Arts and Humanities	Stanford University
Allyson Hobbs	Assistant Professor	Arts and Humanities	Stanford University
Ami Bhatt	Assistant Professor	Medicine/Public Health	Stanford University
Amir Safavi-Naeini	Assistant Professor	Natural Science	Stanford University
Andrea Lunsford	Professor Emeritus	Arts and Humanities	Stanford University
Andrea Montanari	Associate Professor	Engineering	Stanford University
Andrea Nightingale	Professor	Arts and Humanities	Stanford University
Andrew Todhunter	Instructor or Lecturer	Natural Science	Stanford University
Anna Schultz	Assistant Professor	Arts and Humanities	Stanford University
Anna-Sara Malmgren	Assistant Professor	Arts and Humanities	Stanford University
Anne Ehrlich	Professor Emeritus	Natural Science	Stanford University
Anne Fernald	Professor	Natural Science	Stanford University
Anshul Kundaje	Assistant Professor	Medicine/Public Health	Stanford University
Anthony Mara	Instructor or Lecturer	Arts and Humanities	Stanford University
Antonio Vives	Professor	Engineering	Stanford University
Arend Sidow	Associate Professor	Medicine/Public Health	Stanford University
Ari Kelman	Associate Professor	Arts and Humanities	Stanford University
Armin Dale Kaiser	Professor	Natural Science	Stanford University
Arogyaswami Paulraj	Professor Emeritus	Engineering	Stanford University
Aron Rodrigue	Professor	Arts and Humanities	Stanford University
Austin Smith	Instructor or Lecturer	Arts and Humanities	Stanford University
Balaji Prabhakar	Professor	Engineering	Stanford University
Ban Wang	Professor	Arts and Humanities	Stanford University
Barbara Babcock	Professor Emeritus	Law	Stanford University
Barbara Block	Professor	Natural Science	Stanford University
Barbara Gelpi	Professor Emeritus	Arts and Humanities	Stanford University
Barbara Voss	Associate Professor	Social Sciences	Stanford University
Bernadette Meyler	Professor	Law	Stanford University
Bernard Roth	Professor	Engineering	Stanford University
Blakey Vermeule	Professor	Arts and Humanities	Stanford University
Blas Cabrera	Professor	Natural Science	Stanford University
Brenden Willey	Instructor or Lecturer	Arts and Humanities	Stanford University
Brent Sockness	Associate Professor	Arts and Humanities	Stanford University
Brian Kobilka	Professor	Medicine/Public Health	Stanford University
Brian White	Professor	Engineering	Stanford University
Brittany Perham	Instructor or Lecturer	Arts and Humanities	Stanford University
Bryan Wolf	Professor Emeritus	Arts and Humanities	Stanford University
C. Matthew Snipp	Professor	Arts and Humanities	Stanford University
Carl Bielefeldt	Professor Emeritus	Arts and Humanities	Stanford University
Carl E. Thoresen	Professor Emeritus	Medicine/Public Health	Stanford University
Caroline Winterer	Professor	Arts and Humanities	Stanford University
Cecile Alduy	Associate Professor	Arts and Humanities	Stanford University
Cecilia Ridgeway	Professor	Social Sciences	Stanford University
Charles Kronengold	Assistant Professor	Arts and Humanities	Stanford University
Charles Steele	Professor Emeritus	Engineering	Stanford University
Charlie McCarthy	Instructor or Lecturer	Arts and Humanities	Stanford University
Charlotte Fonrobert	Associate Professor	Arts and Humanities	Stanford University
Chris Chafe	Professor	Arts and Humanities	Stanford University
Christine Min Wotipka	Associate Professor	Education	Stanford University
Christopher Gardner	Professor	Medicine/Public Health	Stanford University
Christopher Lowe	Associate Professor	Natural Science	Stanford University
Christopher Piech	Instructor or Lecturer	Engineering	Stanford University
Claude Goldenberg	Professor	Education	Stanford University
Clayborne Carson	Professor	Arts and Humanities	Stanford University
Craig Criddle	Professor	Engineering	Stanford University
Dan Edelstein	Professor	Education	Stanford University
Dan Herschlag	Professor	Medicine/Public Health	Stanford University
Dan Jurafsky	Professor	Engineering	Stanford University
Daniel Barreto	Instructor or Lecturer	Engineering	Stanford University
Daniel Fisher	Professor	Natural Science	Stanford University
Daniel Jarosz	Assistant Professor	Natural Science	Stanford University
Daniel Lassiter	Assistant Professor	Arts and Humanities	Stanford University
Darrell Duffie	Professor	Economics	Stanford University
David B. Grusky	Professor	Arts and Humanities	Stanford University
David Brazer	Associate Professor	Education	Stanford University
David Como	Associate Professor	Arts and Humanities	Stanford University
David Epel	Professor Emeritus	Natural Science/Earth and Atmospheric Science	Stanford University
David Golden	Professor	Engineering	Stanford University
David Hannah	Professor Emeritus	Arts and Humanities	Stanford University
David Hills	Associate Professor	Arts and Humanities	Stanford University
David L. Dill	Professor	Engineering	Stanford University
David Palumbo-Liu	Professor	Arts and Humanities	Stanford University
David R. Riggs	Professor Emeritus	Arts and Humanities	Stanford University
David Tse	Professor	Engineering	Stanford University
Deborah Gordon	Professor	Natural Science	Stanford University
Deborah R. Hensler	Professor	Social Sciences	Stanford University
Debra Satz	Professor	Social Sciences	Stanford University
Denise Gigante	Professor	Arts and Humanities	Stanford University
Derek Ouyang	Instructor or Lecturer	Engineering	Stanford University
Dmitri Petrov	Professor	Natural Science	Stanford University
Donald Kennedy	Professor Emeritus	Natural Science/Earth and Atmospheric Science	Stanford University	National Academy of Sciences
Doug James	Professor	Engineering	Stanford University
Douglas Osheroff	Professor Emeritus	Natural Science	Stanford University
Drew Endy	Associate Professor	Engineering	Stanford University
Duana Fullwiley	Associate Professor	Social Sciences	Stanford University
Elaine Treharne	Professor	Arts and Humanities	Stanford University
Elizabeth A. Hadly	Other	Natural Science/Earth and Atmospheric Science	Stanford University
Elizabeth Closs Traugott	Professor Emeritus	Arts and Humanities	Stanford University
Elizabeth Tallent	Professor	Arts and Humanities	Stanford University
Ellen Jo Baron	Professor Emeritus	Medicine/Public Health	Stanford University
Ellen Porzig	Professor Emeritus	Natural Science	Stanford University
Eric F. Lambin	Professor	Natural Science/Earth and Atmospheric Science	Stanford University	National Academy of Sciences
Eric Knudsen	Professor Emeritus	Medicine/Public Health	Stanford University	National Academy of Sciences
Eric Pop	Associate Professor	Engineering	Stanford University
Eric Roberts	Professor	Engineering	Stanford University
Erik Kolderup	Instructor or Lecturer	Engineering	Stanford University
Erin Mordecai	Assistant Professor	Natural Science	Stanford University
Estelle B. Freedman	Professor	Arts and Humanities	Stanford University
Eva Silverstein	Professor	Natural Science	Stanford University
Eve V. Clark	Professor	Arts and Humanities	Stanford University
Fabio Bany	Assistant Professor	Arts and Humanities	Stanford University
Fiorenza Micheli	Professor	Natural Science/Earth and Atmospheric Science	Stanford University
Franco Moretti	Professor	Arts and Humanities	Stanford University
Fred Turner	Associate Professor	Social Sciences	Stanford University
Gail Wight	Associate Professor	Arts and Humanities	Stanford University
Gavin Jones	Professor	Arts and Humanities	Stanford University
Georg Menz	Assistant Professor	Engineering	Stanford University
George Brown	Professor Emeritus	Arts and Humanities	Stanford University
George N. Somero	Professor Emeritus	Natural Science/Earth and Atmospheric Science	Stanford University
Gilbert Masters	Professor Emeritus	Engineering	Stanford University
Giorgio Gratia	Professor	Natural Science	Stanford University
Giovanna Ceserani	Associate Professor	Arts and Humanities	Stanford University
Giulio De Leo	Professor	Natural Science/Earth and Atmospheric Science	Stanford University
Godfrey Mungal	Professor Emeritus	Engineering	Stanford University
Gordon Chang	Professor	Arts and Humanities	Stanford University
Grant Parker	Associate Professor	Arts and Humanities	Stanford University
Greer Ellison	Instructor or Lecturer	Arts and Humanities	Stanford University
Greg Watkins	Other	Education	Stanford University
Greg Wrenn	Instructor or Lecturer	Arts and Humanities	Stanford University
Gregory Freidin	Professor	Arts and Humanities	Stanford University
Gretchen Daily	Professor	Natural Science/Earth and Atmospheric Science	Stanford University	National Academy of Sciences
Guadalupe Valdes	Professor	Education	Stanford University
Haiyan Lee	Associate Professor	Arts and Humanities	Stanford University
Hans Weiler	Professor Emeritus	Social Sciences	Stanford University
Hari Manoharan	Associate Professor	Natural Science	Stanford University
Harold Kahn	Professor Emeritus	Arts and Humanities	Stanford University
Harold Mooney	Professor Emeritus	Natural Science/Earth and Atmospheric Science	Stanford University	National Academy of Sciences
Harriet Clark	Instructor or Lecturer	Arts and Humanities	Stanford University
Harumi Befu	Professor Emeritus	Social Sciences	Stanford University
Heather Hadlock	Associate Professor	Arts and Humanities	Stanford University
Helen E. Longino	Professor	Arts and Humanities	Stanford University
Henry M. Levin	Professor Emeritus	Economics	Stanford University
Herbert Lindenberger	Professor Emeritus	Arts and Humanities	Stanford University
Hester Gelber	Professor	Arts and Humanities	Stanford University
Hilton Obenzinger	Instructor or Lecturer	Arts and Humanities	Stanford University
Hongjie Dai	Professor	Arts and Humanities	Stanford University
Hunter Fraser	Assistant Professor	Natural Science	Stanford University
Ian Hodder	Professor	Social Sciences	Stanford University
Ian Morris	Professor	Arts and Humanities	Stanford University
Indra Levy	Associate Professor	Arts and Humanities	Stanford University
Ingmar Riedel-Kruse	Assistant Professor	Natural Science	Stanford University
Ingram Olkin	Professor Emeritus	Education	Stanford University
J. Myron Atkin	Professor Emeritus	Education	Stanford University
J. P. Daughton	Associate Professor	Arts and Humanities	Stanford University
Jack Poulson	Assistant Professor	Engineering	Stanford University
Jack Rakove	Professor	Arts and Humanities	Stanford University
James 0. Leckie	Professor	Engineering	Stanford University
James Chen	Associate Professor	Natural Science	Stanford University
James Fearon	Professor	Social Sciences	Stanford University
James Ferguson	Professor	Social Sciences	Stanford University
James Ferrell	Professor	Natural Science	Stanford University
James Holland Jones	Associate Professor	Natural Science/Earth and Atmospheric Science	Stanford University
James J. Gross	Professor	Medicine/Public Health	Stanford University
James Landay	Professor	Engineering	Stanford University
James S. Harris	Professor	Engineering	Stanford University
James Watanabe	Instructor or Lecturer	Natural Science/Earth and Atmospheric Science	Stanford University
Jamie Imam	Instructor or Lecturer	Natural Science	Stanford University
Jamie Meltzer	Associate Professor	Arts and Humanities	Stanford University
Jan Krawitz	Professor	Arts and Humanities	Stanford University
Janet Cooper Alexander	Professor Emeritus	Law	Stanford University
Janine Zacharia	Instructor or Lecturer	Social Sciences	Stanford University
Jay Kadis	Instructor or Lecturer	Arts and Humanities	Stanford University
JB Straubel	Instructor or Lecturer	Engineering	Stanford University
Jean Ma	Associate Professor	Arts and Humanities	Stanford University
Jean-Claude Latombe	Professor Emeritus	Engineering	Stanford University
Jean-Pierre Dupuy	Professor	Arts and Humanities	Stanford University
Jeff Hancock	Professor	Social Sciences	Stanford University
Jeffrey Wine	Professor	Natural Science	Stanford University
Jennifer Devere Brody	Professor	Arts and Humanities	Stanford University
Jennifer Trimble	Associate Professor	Arts and Humanities	Stanford University
Jenny Wilson	Assistant Professor	Engineering	Stanford University
Jeremy Bailenson	Associate Professor	Social Sciences	Stanford University
Jeremy Goldbogen	Assistant Professor	Natural Science	Stanford University
Jeremy Sibel	Instructor or Lecturer	Education	Stanford University
Jesse Rodin	Associate Professor	Arts and Humanities	Stanford University
Jessica Riskin	Associate Professor	Arts and Humanities	Stanford University
Joan Ramon Resina	Professor	Arts and Humanities	Stanford University
Joanna Dearlove	Assistant Professor	Natural Science	Stanford University
Jody Maxmin	Associate Professor	Arts and Humanities	Stanford University
Joe Nation	Professor	Social Sciences	Stanford University
Joel Beinin	Professor	Arts and Humanities	Stanford University
John Cioffi	Professor Emeritus	Engineering	Stanford University
John Felstiner	Professor Emeritus	Arts and Humanities	Stanford University
John J. Donohue Ill	Professor	Law	Stanford University
John Pardon	Assistant Professor	Engineering	Stanford University
John Pencavel	Professor	Economics	Stanford University
John Perry	Professor Emeritus	Arts and Humanities	Stanford University
John R. Pringle	Professor	Medicine/Public Health	Stanford University
John Willinsky	Professor	Education	Stanford University
Jonathan Berek	Professor	Medicine/Public Health	Stanford University
Jonathan Berger	Professor	Arts and Humanities	Stanford University
Jonathan Gienapp	Assistant Professor	Arts and Humanities	Stanford University
Jorge Ruffinelli	Professor	Arts and Humanities	Stanford University
Joseph Lipsick	Professor	Natural Science	Stanford University
Joshua Cohen	Professor	Law	Stanford University
Joshua Landy	Professor	Arts and Humanities	Stanford University
Judith Frydman	Professor	Medicine/Public Health	Stanford University
Julie Kennedy	Professor	Natural Science/Earth and Atmospheric Science	Stanford University
Julie Theriot	Professor	Natural Science	Stanford University
Julius Smith	Professor	Engineering	Stanford University
Jun Uchida	Associate Professor	Arts and Humanities	Stanford University
Justin Sonnenburg	Assistant Professor	Natural Science	Stanford University
Kabir Peay	Assistant Professor	Natural Science	Stanford University
Kai Cason-Wee	Instructor or Lecturer	Arts and Humanities	Stanford University
Karin Forssell	Instructor or Lecturer	Education	Stanford University
Katherine Preston	Other	Natural Science	Stanford University
Kathryn Starkey	Professor	Arts and Humanities	Stanford University
KC Huang	Associate Professor	Natural Science	Stanford University
Keith Ekiss	Instructor or Lecturer	Arts and Humanities	Stanford University
Kendall Walton	Professor	Arts and Humanities	Stanford University
Kenji Hakuta	Professor	Arts and Humanities	Stanford University
Kenneth Fields	Professor	Arts and Humanities	Stanford University
Kenneth Schultz	Professor	Social Sciences	Stanford University
Kent Irwin	Professor	Natural Science	Stanford University
Kevin Grimes	Associate Professor	Natural Science	Stanford University
Kevin Hsu	Instructor or Lecturer	Social Sciences	Stanford University
Krishna Saraswat	Professor	Engineering	Stanford University
Krista Lawlor	Associate Professor	Arts and Humanities	Stanford University
Kristine Samuelson	Professor Emeritus	Arts and Humanities	Stanford University
Kwabena Boahen	Professor	Engineering	Stanford University
Lanier Anderson	Associate Professor	Arts and Humanities	Stanford University
Larry Crowder	Professor	Natural Science/Earth and Atmospheric Science	Stanford University
Larry Cuban	Professor Emeritus	Education	Stanford University
Larry Diamond	Professor	Social Sciences	Stanford University
Larry Regent	Instructor or Lecturer	Arts and Humanities	Stanford University
Laura Stokes	Associate Professor	Arts and Humanities	Stanford University
Laura Wittman	Associate Professor	Arts and Humanities	Stanford University
Lauren Tompkins	Assistant Professor	Natural Science	Stanford University
Lawrence Litvak	Instructor or Lecturer	Social Sciences	Stanford University
Leon Simon	Professor Emeritus	Engineering	Stanford University
Leonard Horowitz	Professor Emeritus	Medicine/Public Health	Stanford University
Leonard Ortolano	Professor	Engineering	Stanford University
Lester Mackey	Assistant Professor	Social Sciences	Stanford University
Liisa Malkki	Associate Professor	Social Sciences	Stanford University
Linda Darling-Hammond	Professor	Education	Stanford University
Linda Hess	Instructor or Lecturer	Arts and Humanities	Stanford University
Linda Shortliffe	Professor	Medicine/Public Health	Stanford University
Linda Uyechi	Instructor or Lecturer	Arts and Humanities	Stanford University
Liqun Luo	Professor	Natural Science	Stanford University
[truncated: 2,552 more rows]
