# Supplementary material for: The role of college and university faculty in the fossil fuel divestment movement
Source: Oxford University Press journal article supplement (doi:10.1525/elementa.297), 2018-01-01
Supplement: elementa-6-297-s2.pdf [file elementa-6-297-s2.pdf]

**Table S2.** Total number of tenured (full and associate professor) and not-yet-tenured tenure-track (assistant professor) faculty employed by each institution as of 2017.

| <b>Institution</b>         | <b>Status</b> | <b>Signed</b> | <b>Not Signed</b> | <b>% Signed</b> | <b>Divestment Action</b> |
|----------------------------|---------------|---------------|-------------------|-----------------|--------------------------|
| Boston University          | Tenured       | 173           | 514               | 25.2            | Coal & oil sands         |
|                            | Tenure-Track  | 32            | 174               | 15.5            |                          |
| Georgetown University      | Tenured       | 50            | 470               | 9.6             | Coal                     |
|                            | Tenure-Track  | 25            | 104               | 19.4            |                          |
| Seattle University         | Tenured       | 100           | 146               | 40.7            | Coal                     |
|                            | Tenure-Track  | 20            | 66                | 23.3            |                          |
| Stanford University        | Tenured       | 279           | 1432              | 16.3            | Coal                     |
|                            | Tenure-Track  | 43            | 409               | 9.5             |                          |
| University of Chicago      | Tenured       | 137           | 567               | 19.5            | Declined to divest       |
|                            | Tenure-Track  | 44            | 242               | 15.4            |                          |
| University of Pennsylvania | Tenured       | 80            | 730               | 9.9             | Declined to divest       |
|                            | Tenure-Track  | 15            | 221               | 6.4             |                          |
| Western Washington U       | Tenured       | 145           | 227               | 39              | Declined to divest       |
|                            | Tenure-Track  | 37            | 91                | 28.9            |                          |
| Yale University            | Tenured       | 68            | 514               | 11.7            | Coal & oil sands         |
|                            | Tenure-Track  | 32            | 241               | 11.7            |                          |
| Bowdoin College            | Tenured       | 44            | 79                | 35.8            | Declined to divest       |
|                            | Tenure-Track  | 13            | 36                | 26.5            |                          |
| Middlebury College         | Tenured       | 9             | 189               | 4.5             | Declined to divest       |
|                            | Tenure-Track  | 2             | 65                | 3.0             |                          |
| MIT                        | Tenured       | 55            | 706               | 7.2             | Declined to divest       |
|                            | Tenure-Track  | 5             | 246               | 2.0             |                          |
| Northeastern University    | Tenured       | 48            | 509               | 8.6             | Declined to divest       |
|                            | Tenure-Track  | 14            | 199               | 6.6             |                          |
| Oregon State               | Tenured       | 48            | 572               | 7.7             | Full divestment          |
|                            | Tenure-Track  | 13            | 301               | 4.1             |                          |
| Swarthmore College         | Tenured       | 14            | 112               | 11.1            | Declined to divest       |
|                            | Tenure-Track  | 5             | 32                | 13.5            |                          |
| Tufts University           | Tenured       | 29            | 297               | 8.9             | Declined to divest       |
|                            | Tenure-Track  | 2             | 96                | 2.0             |                          |
| University of Denver       | Tenured       | 45            | 307               | 12.6            | Declined to divest       |
|                            | Tenure-Track  | 18            | 92                | 16.4            |                          |
| University of Maine        | Tenured       | 30            | 276               | 9.8             | Coal                     |
|                            | Tenure-Track  | 4             | 80                | 4.8             |                          |
| Vassar College             | Tenured       | 32            | 172               | 15.7            | Declined to divest       |
|                            | Tenure-Track  | 3             | 26                | 10.3            |                          |
| Total                      | Tenured       | 1386          | 7619              | 15.4            |                          |
|                            | Tenure-Track  | 327           | 2721              | 10.7            |                          |
